# Supplementary material for: Fault Diagnosis of Piezoelectric Sensor Patches for Vibration Control Based on Multifeature Fusion and Improved SVM
Source: Hindawi journal article supplement (doi:10.1155/2019/8239198), 2019-01-01
Supplement: f1 [file 8239198.f1.zip]

Archive with 2 entries (2 files):
- 8239198.f1/1-Supplementary Materials.xlsx
- 8239198.f1/2-Supplementary Materials.xlsx
