# Supplementary material for: Fault Diagnosis of Piezoelectric Sensor Patches for Vibration Control Based on Multifeature Fusion and Improved SVM
Source: Hindawi journal article supplement (doi:10.1155/2019/8239198), 2019-01-01
Supplement: f1 [file 8239198.f1.zip › 8239198.f1/1-Supplementary Materials.xlsx]

## Sheet: Sheet1
Normal piezoelectric patch
The duty cycle of the signal	SVD values					Hilbert marginal spectral characteristics
0.025	79.9858	5.40461	0.284429	0.251197	0.109675	207.5	45.5	23	10	5	0.0526823	0.000368718	8.88321e-07	6.00511e-06	1.14515e-06
0.05	85.038	6.27945	0.901937	0.0915427	0.0505174	205	55	9	4.5	2.5	0.0821121	0.000474849	4.22043e-05	4.53978e-07	3.24077e-07
0.075	88.4303	6.88584	1.30398	0.0836275	0.0723612	207	54	10	4	2	0.0510608	0.000813411	8.04371e-05	6.32616e-07	7.25535e-07
0.1	88.9257	7.16585	1.45215	0.269049	0.158702	208.5	48.5	10	8	1	0.0437327	0.00073069	0.000128303	2.28215e-06	4.67375e-06
0.125	85.6982	7.16354	1.23851	0.115837	0.058804	211	49	9.5	5	2.5	0.0362364	0.000802895	0.000104513	8.91629e-07	6.0162e-07
0.15	85.3765	7.30916	1.23633	0.0352838	0.0248732	213.5	43	10.5	4.5	2.5	0.0218163	0.00065293	6.78409e-05	7.92096e-08	6.95471e-08
0.175	84.8456	7.23436	1.37297	0.0883951	0.0724056	215.5	49	9.5	4	2	0.0194299	0.000851473	8.3183e-05	3.6659e-07	9.37719e-07
0.2	81.1855	6.64008	1.05476	0.215518	0.141868	223	54.5	9	6	3	0.0220753	0.000430575	6.85528e-05	1.48601e-06	1.91889e-06
0.225	78.492	6.4681	1.18807	0.0870967	0.0601435	226.5	55.5	9.5	6	0.5	0.0211737	0.000515235	6.98493e-05	1.98262e-07	8.73677e-07
0.25	73.8715	6.14785	1.22029	0.0838891	0.0666608	226.5	46.5	9.5	5	5.5	0.0204851	0.000659852	0.000131387	2.45425e-07	2.1178e-07
0.275	75.952	5.03169	0.812869	0.668608	0.220052	202	41.5	7	10	5.5	0.0424442	0.000195682	6.72733e-06	6.75248e-05	1.90318e-06
0.3	85.6515	5.52643	0.880383	0.0753097	0.0392363	202	46.5	8.5	5	1.5	0.080052	0.00032019	3.79488e-05	4.41917e-07	1.01484e-07
0.325	89.9329	4.63024	4.08209	0.819214	0.426386	202.5	44	51	9.5	11	0.0777935	0.00018286	0.000308032	2.18743e-05	3.77655e-06
0.35	94.6964	6.44512	2.98981	1.32421	0.642529	203.5	42	12	20.5	10	0.0561925	0.000731079	9.08838e-05	5.15077e-05	1.78353e-05
0.375	87.4336	6.49381	0.807641	0.128965	0.080782	204	41	8	5	3	0.0303913	0.000495937	2.67294e-05	1.23127e-06	7.27274e-07
0.4	84.9975	6.49873	1.10697	0.138427	0.0787168	205.5	43	8.5	5	2.5	0.0305547	0.000622582	3.80112e-05	2.28667e-06	4.05199e-07
0.425	86.6185	6.68817	1.25423	0.326591	0.0700606	208.5	40.5	9.5	5	4	0.0238281	0.00109951	6.28861e-05	4.31513e-06	2.28024e-07
0.45	72.4154	5.64159	0.408303	0.265913	0.0477939	224.5	42.5	12.5	10	4.5	0.0106866	0.000694947	1.56216e-06	1.73334e-05	1.52156e-07
0.475	73.2578	5.83103	0.241814	0.178418	0.0276244	225.5	45	7	10	2.5	0.014265	0.000628228	5.66564e-07	5.7037e-06	4.95025e-08
0.5	80.9994	6.88587	0.893391	0.0513703	0.0355846	224.5	49.5	9	5	2.5	0.0245173	0.000513946	2.9821e-05	1.67311e-07	1.80876e-07
Broken piezoelectric patch
The duty cycle of the signal	SVD values					Hilbert marginal spectral characteristics
0.025	55.3311	16.5432	9.89048	6.93128	1.88619	159.5	131.5	34.5	52	7	0.0226499	0.00176947	0.000738162	0.000823627	0.000131062
0.05	67.2975	3.13629	1.60071	0.242945	0.118162	155.5	104.5	52	27	10	0.0523101	1.56866e-05	0.000139867	2.02711e-07	1.58014e-06
0.075	71.7794	3.27224	2.68973	0.387739	0.300106	155	40	49	9.5	10	0.0455054	0.000103507	0.00010867	1.8146e-06	8.50882e-06
0.1	71.5637	3.48983	2.91825	0.287075	0.251775	199	40	50.5	19	9.5	0.0439261	0.000144668	0.000149097	1.25926e-06	1.88256e-06
0.125	74.1588	3.26878	2.91419	0.570641	0.431744	159	46	50	18.5	10	0.0483733	8.92812e-05	0.0002126	2.10642e-06	1.22518e-05
0.15	71.8636	3.94306	3.24656	1.08803	0.627612	156.5	39	50.5	25	11	0.0578228	0.000124959	0.000109903	2.14551e-05	9.68116e-06
0.175	71.1552	3.91998	3.3243	0.485848	0.456455	156.5	43.5	50	21.5	10	0.0606835	0.000129973	0.000161385	2.39292e-06	1.21596e-05
0.2	72.4536	5.01132	2.05891	1.0278	0.569434	156.5	42	28	8.5	10.5	0.054763	0.000233929	2.59627e-05	2.15178e-05	9.24865e-06
0.225	70.0828	4.4525	2.87664	1.25456	0.640454	157	44.5	31	27.5	9	0.047287	0.000183571	0.00014339	4.61265e-05	1.09537e-05
0.25	67.8964	4.69396	1.64228	1.01354	0.626659	160.5	47.5	33	8.5	10	0.0458988	0.000223576	2.84855e-05	2.07167e-05	1.08669e-05
0.275	67.6947	4.98489	1.02727	0.100356	0.0667742	161	42	9.5	3	1	0.0240125	0.000372062	4.50704e-05	5.65038e-07	3.6233e-07
0.3	61.04	4.3613	1.47862	0.82431	0.46038	205	48.5	23	9.5	9.5	0.0186116	0.000161666	1.34774e-05	1.84369e-05	1.21028e-05
0.325	66.4109	4.9323	1.95516	0.97465	0.693486	206.5	42.5	26.5	8.5	9.5	0.0166754	0.00021933	1.73383e-05	2.60602e-05	2.81048e-05
0.35	60.6485	4.50455	0.796395	0.572369	0.277504	207.5	40.5	9.5	9	10	0.0129322	0.000439617	1.96567e-05	9.46434e-06	2.80493e-06
0.375	60.3372	4.59466	0.654294	0.180546	0.114693	208	41	10	5.5	3.5	0.0113349	0.000568819	1.47261e-05	1.25392e-06	9.74908e-07
0.4	59.8655	4.62516	0.434178	0.362327	0.0743969	209	42	7.5	10	3.5	0.0103894	0.000526269	6.53453e-06	1.0949e-05	2.00892e-07
0.425	54.4685	4.77261	0.875911	0.654252	0.231677	211	42.5	22	16	11.5	0.00954757	0.000274192	3.1168e-05	1.58562e-05	2.35447e-06
0.45	53.9977	4.53188	0.529507	0.154489	0.0794214	218	48.5	9.5	6	4	0.00877745	0.000200272	1.16248e-05	5.55818e-07	9.17832e-07
0.475	52.622	4.5364	0.725948	0.0962839	0.0528745	220	49.5	9.5	1.5	1.5	0.00897499	0.000255269	2.10341e-05	4.02736e-07	9.7559e-07
0.5	52.469	4.44251	0.869216	0.138747	0.0780641	225	46.5	9.5	1.5	1.5	0.0130344	0.000229203	4.36563e-05	9.90744e-07	1.11175e-06
Degummed piezoelectric patch
The duty cycle of the signal	SVD values					Hilbert marginal spectral characteristics
0.025	1.2789	0.109985	0.0337185	0.01631	0.00951604	179.5	48.5	27.5	19	10	4.54789e-06	8.16378e-08	8.10773e-09	4.39307e-09	2.19276e-09
0.05	1.23365	0.101736	0.0231613	0.0135782	0.00973205	224.5	41.5	27.5	19.5	9	3.87372e-06	6.29145e-08	5.29828e-09	2.18088e-09	2.33836e-09
0.075	1.23223	0.0974596	0.0145824	0.011448	0.00610348	223.5	49	21	10.5	2.5	5.66105e-06	7.14081e-08	2.59083e-09	2.52516e-09	1.1164e-09
0.1	1.2698	0.100371	0.0484103	0.021609	0.0132775	223.5	40	18.5	10.5	9	4.72217e-06	6.2229e-08	2.88802e-08	1.65989e-08	8.50445e-09
0.125	1.28208	0.0983891	0.0126874	0.00839418	0.00536647	225.5	44.5	20.5	9.5	5	3.91176e-06	6.28717e-08	1.89089e-09	2.39186e-09	8.5362e-10
0.15	1.34631	0.102163	0.0513464	0.0148569	0.00988776	224.5	40	28	20.5	10	4.05886e-06	6.37743e-08	2.29811e-08	3.06224e-09	2.23759e-09
0.175	1.28278	0.0910833	0.0157622	0.0128245	0.00676566	224.5	44	14	9.5	4.5	4.13422e-06	6.39915e-08	2.58278e-09	4.03424e-09	1.88507e-09
0.2	1.27785	0.0818309	0.0231335	0.014669	0.00841218	187.5	46	30	9	5	4.44353e-06	4.00923e-08	4.60568e-09	4.51292e-09	1.92388e-09
0.225	1.36647	0.0930705	0.0181976	0.0148564	0.00726761	225	43	23	9.5	5.5	4.88817e-06	6.10274e-08	3.15827e-09	5.75887e-09	1.57582e-09
0.25	1.31099	0.0866855	0.0251788	0.0159771	0.0117789	188	40.5	31.5	11	8	4.38388e-06	5.06897e-08	5.21395e-09	4.01161e-09	3.13312e-09
0.275	1.31112	0.090802	0.0208797	0.0156451	0.0115636	187	42.5	24	11	6	4.75363e-06	5.17677e-08	2.85967e-09	4.27682e-09	3.31683e-09
0.3	1.34571	0.112818	0.0123273	0.00722036	0.00567977	224.5	46	18	7	3	5.58092e-06	1.17572e-07	1.84426e-09	8.61137e-10	1.14287e-09
0.325	1.3572	0.114457	0.0100138	0.00962794	0.00715171	221.5	47.5	19	9	5	5.42313e-06	1.15745e-07	1.11414e-09	1.89543e-09	1.82487e-09
0.35	1.27762	0.111973	0.0124333	0.0117471	0.00653011	224.5	47.5	20.5	9.5	5	4.99305e-06	1.07104e-07	1.16165e-09	4.03118e-09	1.72737e-09
0.375	1.3561	0.113227	0.0147504	0.0102426	0.00665114	224	45.5	23.5	10.5	5.5	5.58663e-06	9.67833e-08	1.81284e-09	1.73363e-09	1.92454e-09
0.4	1.38008	0.116509	0.0126572	0.00895422	0.00648186	224	45	16.5	10.5	4.5	5.61085e-06	1.12827e-07	2.18121e-09	1.88742e-09	1.57463e-09
0.425	1.39703	0.124986	0.0125122	0.0109425	0.00531123	222.5	45	17.5	9.5	5	5.61073e-06	1.28785e-07	1.33925e-09	6.52116e-09	1.51258e-09
0.45	1.37498	0.124087	0.0183918	0.0178018	0.00838572	222.5	50	8.5	10.5	6	5.28578e-06	1.25642e-07	4.55471e-09	9.50655e-09	2.57598e-09
0.475	1.38657	0.127201	0.0221217	0.0201573	0.00675514	222.5	47.5	8	9.5	5	5.80117e-06	1.26648e-07	9.63817e-09	1.32001e-08	2.2158e-09
0.5	1.38591	0.130668	0.0183341	0.0160775	0.00553735	224.5	50	7.5	9.5	2.5	5.87215e-06	1.4999e-07	5.62028e-09	1.03534e-08	1.12139e-09
