# Supplementary material for: Fault Diagnosis of Piezoelectric Sensor Patches for Vibration Control Based on Multifeature Fusion and Improved SVM
Source: Hindawi journal article supplement (doi:10.1155/2019/8239198), 2019-01-01
Supplement: f1 [file 8239198.f1.zip › 8239198.f1/2-Supplementary Materials.xlsx]

## Sheet: Sheet1
	0.5dBW noise															0.6dBW noise															0.7dBW noise															0.8dBW noise
	SVD values					Hilbert marginal spectral characteristics										SVD values					Hilbert marginal spectral characteristics										SVD values					Hilbert marginal spectral characteristics										SVD values
Normal	75.7017	29.5085	14.7799	10.1555	6.85936	201.5	126.5	72.5	45	17.5	0.00874756	0.00126849	0.00059386	0.000432647	0.000519286	74.1187	34.4631	16.9895	12.147	8.79708	205.5	121	105.5	47	21	0.00751593	0.0016883	0.00067774	0.000631543	0.000514505	74.7036	36.9029	18.5054	12.3235	9.60967	159	222	100	43	26	0.00783355	0.00233599	0.000842651	0.000665553	0.000540764	76.7848	40.0035	20.5585	13.569
	83.93	17.3864	11.4205	7.92762	5.83858	204.5	98.5	52	25	17.5	0.0121282	0.000598914	0.000548995	0.000423972	0.000381866	85.175	23.9251	14.2884	9.1327	6.92253	205	120.5	39.5	27.5	19.5	0.0110735	0.00118397	0.00064417	0.000781109	0.000520151	85.5809	28.3416	16.4235	11.7223	7.8627	166	119.5	74	29.5	18	0.0104876	0.00154604	0.000919802	0.000795697	0.000554129	86.4829	32.421	19.5818	12.5852
	85.3568	30.2542	15.6024	10.3602	7.35376	159	125.5	84.5	47	25	0.0120808	0.00189856	0.000743044	0.00043904	0.000485205	83.4761	35.6192	17.6736	13.5269	9.19136	159.5	121.5	85	50.5	24.5	0.011098	0.00170545	0.000789549	0.000747571	0.000516176	82.9137	41.3723	21.5956	14.0632	9.24797	164.5	126	117	34.5	26.5	0.00964307	0.00259829	0.00112083	0.000696557	0.000766465	84.7494	42.9985	19.899	13.9996
	88.9834	17.3179	10.0573	7.57478	5.26477	207.5	111	49	26	12.5	0.0152443	0.000626334	0.000389885	0.000389907	0.00034588	89.6671	22.2597	13.8444	9.29424	6.74694	211	68.5	51.5	21.5	14.5	0.0110505	0.000935232	0.000571916	0.000486744	0.000492024	91.5051	26.9278	17.5163	10.9555	8.63235	201.5	126.5	81	32	25.5	0.0123358	0.00134299	0.000907708	0.000561301	0.000588325	91.8667	32.8438	17.9921	12.3538
	91.9715	26.6411	15.0264	9.85796	6.90977	156.5	116.5	49.5	26	22	0.0146919	0.00165432	0.000628262	0.000494824	0.000395142	89.5106	33.7497	16.79	11.7299	8.90297	165.5	164	80.5	47.5	20.5	0.0138217	0.00155424	0.000854218	0.000617155	0.000685996	88.1787	39.7639	20.5088	14.7226	11.3047	163.5	178	105	56	22	0.013623	0.00213533	0.00105172	0.000770226	0.000719115	92.3996	40.8336	22.3216	14.411
	92.1722	14.2522	11.2128	7.22731	5.16929	213	97	51	23	10	0.014729	0.000508752	0.000579323	0.000576204	0.000371154	93.1712	22.1228	13.7019	9.98705	6.72801	216.5	120	53.5	31	14.5	0.0127453	0.00117351	0.000660654	0.000545288	0.000745931	95.3639	25.9409	15.9156	10.9753	7.66976	206	95	62	21	14	0.0138516	0.00124571	0.00103711	0.00087796	0.00072414	94.3102	33.4215	19.8727	13.8034
	96.0984	25.66	14.8031	10.2682	7.89563	206	127.5	69.5	51.5	30.5	0.0150001	0.00142698	0.00066937	0.000454772	0.000398021	96.2637	30.1297	16.6106	11.6671	7.91291	160	118.5	81.5	39.5	17	0.0146291	0.00165211	0.000832479	0.0007266	0.000600271	98.0426	34.5705	18.7819	13.6178	9.13756	161.5	126	60.5	17	15.5	0.0164456	0.00250018	0.000876787	0.00104162	0.000675452	95.3845	41.6569	21.1566	15.2307
	92.2769	14.2149	10.1678	7.47461	5.22024	183	100	41	29.5	16.5	0.0144584	0.000565447	0.000461323	0.000445133	0.000336782	93.5631	22.1034	12.639	9.26991	6.83373	210	97.5	55	16.5	15	0.0133523	0.00124773	0.000574045	0.000500054	0.000549977	95.8968	24.7324	13.7671	11.154	8.7167	209	102	55	30.5	12	0.0147677	0.0012868	0.000781541	0.000738695	0.000997137	97.2016	30.8837	17.7482	12.9403
	90.2801	21.2657	13.4913	8.7537	6.22565	163.5	117.5	58.5	34	9.5	0.0134107	0.00102293	0.000695529	0.000434788	0.000360888	88.7783	30.6367	16.746	11.6269	7.67365	163.5	120.5	57	41	17	0.0117597	0.001644	0.000782301	0.000651911	0.000429667	91.5937	32.0797	18.1221	11.4858	9.75359	161	126.5	99	42	16	0.0141935	0.00170531	0.000804972	0.000519094	0.000950554	93.0573	35.2834	19.7189	14.3646
	89.518	15.0072	10.9966	7.42308	5.99006	208	103	51.5	18.5	11	0.0127139	0.000913562	0.000529983	0.000393597	0.000524855	90.9826	18.8268	12.4683	8.16191	6.17416	211	103	41	24.5	10.5	0.0137618	0.000920518	0.000941676	0.000455206	0.000399802	93.5425	22.5258	14.9537	10.3831	8.05341	214	117	55.5	20.5	14.5	0.0124343	0.00131681	0.000863103	0.000652405	0.00082092	94.9956	29.0285	16.792	11.5601
	88.622	17.7294	11.5841	7.95051	5.50648	208	99.5	58	23.5	11	0.0115237	0.000821529	0.000572263	0.000457832	0.000428516	89.6041	22.2593	15.4366	10.1811	7.25494	205.5	120	72	32	15	0.0140052	0.00129496	0.000631102	0.000670228	0.000596004	91.3272	27.5934	14.7413	12.3973	8.79674	209	24	49.5	43.5	20.5	0.0134694	0.00123164	0.000624923	0.000706305	0.000811516	90.6567	34.3927	19.2882	14.9073
	89.2219	13.3537	9.52782	6.09142	4.8967	215.5	97.5	46	23.5	13.5	0.0133018	0.000436498	0.000520196	0.000311847	0.000326787	91.0013	18.606	13.3553	8.64537	5.84653	181	103	51	8.5	16	0.0136392	0.000946314	0.000624822	0.000835208	0.000444084	91.9537	23.6468	15.5288	10.7058	7.69111	211.5	117	57.5	31.5	16	0.0131804	0.00139908	0.000732772	0.000736848	0.000634639	93.4583	30.5442	17.4753	11.5099
	90.2905	15.9238	12.0698	7.38034	5.38079	209	98.5	50.5	29	14	0.0130081	0.000748622	0.000751327	0.000338754	0.000346423	92.0007	19.5738	14.1103	8.7811	6.77894	210.5	119.5	59	31.5	16	0.0130657	0.000912727	0.000667352	0.000473856	0.00042912	92.7155	26.2847	14.4709	10.4616	7.92789	210	108	64	40	14.5	0.0131078	0.00129304	0.000729394	0.000564793	0.000683422	94.5073	30.4128	17.5501	11.6983
	88.7725	13.8185	9.81168	7.19212	4.85711	213	83.5	46.5	25.5	10	0.0142054	0.00054463	0.000509882	0.00039567	0.00036894	90.6321	18.4074	12.3559	8.44123	6.00271	216	99	42.5	15.5	13.5	0.0126104	0.000937157	0.000710055	0.000533761	0.000442777	91.7575	22.9923	14.4735	10.7457	7.91343	183	103.5	50	24.5	14	0.0130996	0.00136362	0.000725735	0.000674648	0.000736591	92.8652	29.8044	17.6159	12.5502
	76.9354	14.0309	9.7912	7.48727	5.5958	213	86	35	26.5	17	0.0101825	0.00057504	0.000455378	0.000342935	0.00041762	78.9973	18.9548	12.8155	8.14357	5.83716	217	119.5	56	22	15.5	0.00904133	0.00104392	0.000689873	0.000461492	0.000481518	80.3262	23.7823	14.0972	10.349	7.28058	215	98.5	63	23	18	0.00879141	0.00120964	0.000762987	0.000674321	0.000556598	79.0632	32.47	18.0623	13.3451
	85.0716	14.4165	9.5088	7.40319	5.47406	214	97.5	49	21.5	15	0.0133059	0.000518587	0.000420316	0.000425301	0.000421667	87.0903	16.7145	12.1679	8.86478	6.41183	215	83.5	46	23.5	15.5	0.0136201	0.000749152	0.000636192	0.00053795	0.000524745	88.9618	20.8332	14.3282	9.41154	7.32035	209.5	124.5	50	22.5	11	0.0132969	0.000979828	0.000777072	0.000693435	0.000595211	90.7141	27.7529	15.8808	12.1304
	77.6407	12.1648	9.65474	7.20768	5.4483	210	85	55	12.5	16	0.00948512	0.000413606	0.000402995	0.000336234	0.000360869	79.833	18.9691	12.0979	8.94083	5.50438	207.5	99.5	49.5	29	13	0.00963081	0.000855109	0.00044946	0.000543341	0.000397519	80.9157	23.3558	16.572	11.0419	7.97559	209.5	124.5	61.5	27	17	0.00973748	0.00122236	0.000929675	0.000707498	0.000590267	81.5536	30.0352	17.9295	11.0302
	83.0601	13.1205	9.30281	6.91167	4.97658	216.5	84	46.5	20.5	9	0.0132627	0.000525273	0.000458999	0.000528695	0.000440609	84.8864	17.4673	12.7984	7.75101	5.94988	212.5	81	37	15	13.5	0.0118227	0.000703858	0.00091071	0.000420801	0.000494023	86.7293	22.605	14.2711	10.4913	7.33326	205	97.5	50	23.5	14.5	0.0124991	0.000996353	0.000645495	0.000766761	0.000627681	88.2306	27.5546	15.7093	12.2921
	85.3372	12.7196	8.90722	6.90864	4.76795	215.5	84	44	22.5	8.5	0.01325	0.000451864	0.00036979	0.000395096	0.000411692	87.2658	16.8972	12.4607	8.41008	6.09629	211.5	96	53	22	11	0.0140504	0.000872642	0.000641075	0.000487788	0.000412233	88.9904	20.5091	13.0747	9.60972	8.0709	211	93	54	22.5	12.5	0.0124404	0.000958778	0.000621464	0.00071322	0.00069866	89.7013	28.729	17.8647	12.6892
	78.223	13.3582	10.018	6.88367	5.33853	211	92	50	21	10	0.0099911	0.000502558	0.000461915	0.000393513	0.000492998	80.21	18.2279	12.1887	8.3364	6.55779	215	96	52	10	12	0.0102563	0.000784103	0.000632939	0.000465217	0.000520515	82.7887	21.754	13.8097	9.65291	7.83354	181.5	116	49	29.5	13.5	0.0098652	0.00103153	0.00066122	0.00074498	0.000767148	82.8812	29.7561	17.5353	13.1208
Broken	52.1645	31.1895	13.7595	9.76449	6.91027	158	185	99.5	43.5	23.5	0.0044746	0.00157684	0.000526827	0.000393349	0.000403373	54.4993	32.6062	16.5124	11.5195	7.72079	157.5	185.5	103	40.5	23.5	0.00350184	0.00153579	0.000572328	0.000598921	0.00048138	58.1713	32.6468	17.9261	12.5721	9.13029	163	216.5	100	38	20	0.0038897	0.00153265	0.000672492	0.000702959	0.000683383	58.9785	35.8654	17.7325	12.098
	60.6711	34.6651	16.0869	11.0915	8.07703	158	223	106	46	26	0.00566347	0.0015858	0.0007614	0.000497902	0.000383305	62.8095	35.2583	16.462	11.9852	8.38727	159.5	180.5	85	46	26.5	0.0058155	0.0017338	0.000556509	0.000616367	0.000493172	65.8771	36.0944	17.5216	10.9552	8.90456	156.5	221.5	83.5	49	24.5	0.00522629	0.00204109	0.000811169	0.000528269	0.000683742	63.5237	40.9362	19.2638	12.8867
	65.3782	36.1117	15.4265	11.2772	8.34856	159.5	186.5	101	55.5	32.5	0.00723171	0.00174498	0.000588324	0.000795052	0.000403622	66.7059	35.5409	16.4147	12.3262	8.05837	159.5	223	78.5	43.5	19.5	0.00669196	0.00176681	0.000643298	0.00073934	0.000551252	67.6862	39.7197	16.3157	12.3216	8.13874	159.5	222	75	33.5	15.5	0.00525668	0.00262318	0.000682485	0.000637905	0.000556908	73.9076	38.0065	20.4115	13.5946
	68.0516	32.8213	14.7389	11.4075	8.25455	155	121	87.5	46	23	0.00708802	0.00139235	0.000618019	0.000615687	0.000474293	66.2363	36.1837	16.4695	12.4284	8.40766	159.5	184	94.5	51	13	0.00590987	0.00208939	0.000582799	0.000613666	0.000534613	69.7962	36.7326	18.3065	12.716	9.43628	161	225.5	86	47.5	21	0.0067277	0.00166023	0.000733553	0.000642083	0.000612835	70.5733	39.335	19.6377	15.215
	67.4055	36.3453	16.5797	12.1522	8.24755	162.5	223	118	49.5	29.5	0.00831454	0.00163136	0.000651177	0.000679251	0.000389699	69.7499	37.5811	18.4509	13.4886	8.36873	161.5	225.5	94.5	48.5	26.5	0.00741536	0.00199078	0.000731067	0.000825056	0.000651518	72.6813	37.5881	19.1676	13.05	8.91662	159	223	91	45.5	27	0.00772273	0.00177215	0.000880985	0.000909982	0.000502656	70.8939	42.0257	21.7463	14.9095
	65.4911	34.4178	18.3171	11.8672	8.33923	165.5	182.5	121.5	53.5	27.5	0.00693415	0.00155201	0.000823859	0.000587008	0.000489777	68.2279	35.5677	17.7448	12.2413	8.68354	163	179.5	86	46.5	21	0.00679351	0.00166381	0.000656743	0.000824085	0.000660052	69.3112	37.6124	18.4476	13.1474	8.71031	159.5	184	80	46	24	0.00685298	0.00201196	0.000742363	0.00063078	0.000619509	70.153	40.1315	20.1827	15.0919
	67.1542	31.7559	15.1598	11.3051	7.74307	158	225	95.5	47	30	0.00712617	0.00130843	0.000613431	0.00066407	0.00043725	66.6935	35.4223	17.9744	12.3952	8.88293	160	180	116	51.5	25.5	0.00608925	0.00182107	0.000658745	0.000594533	0.000675183	70.5749	35.8342	18.9461	13.6148	9.54205	162.5	180.5	96	45.5	20	0.00728141	0.00165204	0.000883475	0.000802941	0.000729293	69.1938	40.3047	20.0044	13.3498
	69.8057	32.0768	15.9379	11.2201	7.30181	162.5	227.5	103.5	43	26	0.00826164	0.00142597	0.0006182	0.000677363	0.000442807	68.007	34.992	17.2838	12.9246	8.58649	204	223	93.5	51	23	0.00639904	0.00184386	0.000624501	0.000690267	0.000576675	71.7262	36.803	17.7659	11.8883	9.47425	162	175	74.5	50.5	28	0.00676441	0.00191946	0.000738833	0.00060063	0.000630156	72.8831	39.5862	19.7205	13.7243
	68.6269	29.4441	15.3606	9.99258	7.12618	158	224	82	46	16	0.00716788	0.00129217	0.000552602	0.00050921	0.000543492	69.6543	31.5678	16.0498	11.2452	7.95281	159	121.5	81.5	46	30	0.00783661	0.00132876	0.000701176	0.000659531	0.000412592	69.7451	36.0175	17.2098	11.2287	8.61208	161.5	180	80.5	43	16	0.0061616	0.0021144	0.000728636	0.000702328	0.000604127	71.6208	37.6776	20.0085	13.2894
	68.4387	26.5319	13.9214	10.2906	6.83574	158.5	122.5	93	36	14.5	0.00687136	0.00160285	0.0005147	0.000516665	0.000376974	67.4	30.8703	16.3128	11.514	8.13936	156	177.5	82.5	47	11	0.00710658	0.0012423	0.00068087	0.000526648	0.000518784	69.3028	33.0497	17.644	13.1874	9.27949	163.5	223	67.5	53	17.5	0.00693516	0.00144167	0.000669045	0.000784273	0.000663724	69.731	36.9524	19.7645	14.7973
	68.5974	25.1235	13.3003	9.55773	6.78945	161.5	119.5	54	48.5	14	0.00669926	0.000911704	0.000500549	0.000381612	0.000426845	68.7912	29.0939	14.6483	11.1396	7.31132	157.5	125.5	46	36.5	22	0.00741765	0.00113606	0.000709005	0.000599051	0.000405865	72.3111	30.197	17.9219	12.7499	8.76195	206	120	77	35.5	14	0.00755505	0.00169639	0.000847266	0.000845113	0.000617452	70.0078	36.5593	18.01	12.9276
	64.7646	20.8028	12.6701	7.93711	6.11449	207	117.5	59.5	30.5	16.5	0.0066353	0.000757776	0.000498043	0.000398421	0.000404427	64.6113	26.536	14.9669	10.7627	6.64659	162.5	123.5	77.5	23.5	21	0.00631985	0.00102924	0.000553092	0.000496689	0.000367202	65.2014	30.297	17.3739	11.0601	9.27074	171	222.5	81	32	19	0.00578939	0.0013678	0.000677586	0.000506716	0.000704229	66.5567	32.7773	18.3237	13.359
	70.5743	18.8604	11.3435	8.53798	5.7278	207	119	49.5	27	18	0.00770797	0.000961463	0.000413743	0.000419271	0.000319943	70.578	25.108	13.7066	9.69451	7.42489	164.5	122	60	40	18	0.0071	0.00100602	0.000582175	0.000615529	0.000613555	73.47	25.8061	16.2422	11.2323	8.06402	159	119	86.5	35	16.5	0.00768035	0.00119048	0.000616857	0.000621233	0.000554085	72.0691	33.9551	17.6187	12.6614
	65.2402	17.9162	11.7946	8.14925	5.95182	207	58.5	60.5	20	11	0.00653556	0.000574683	0.000423613	0.000414522	0.000363416	65.8203	23.9665	13.6014	10.2414	6.93142	159.5	118	75.5	38.5	20	0.0064257	0.00117593	0.000509291	0.00051085	0.000452851	65.8708	27.8096	16.6681	10.9566	7.74788	209	127	60.5	37	23.5	0.00586202	0.00105766	0.000757791	0.000512078	0.000499314	66.2073	32.972	17.9948	13.2474
	65.0892	17.8225	11.5907	7.16335	5.98958	206.5	115.5	41	31.5	11	0.00632701	0.000710846	0.000440137	0.000311782	0.000447002	66.6358	23.1152	14.4494	9.24793	7.02209	206	123	67.5	39.5	24.5	0.00749527	0.00127273	0.000526542	0.000497966	0.000406504	67.9963	26.5183	16.1555	11.0763	6.93971	207.5	122.5	79.5	38.5	21.5	0.00609193	0.0012875	0.000698367	0.00057062	0.000499421	66.6007	31.9708	19.159	12.6701
	64.8734	17.1444	10.505	7.56711	6.0847	209.5	117.5	61.5	32.5	17.5	0.0061091	0.000646932	0.000361064	0.000276743	0.000312093	66.0171	22.0093	12.7894	9.93913	7.25657	209.5	121	60	36.5	15.5	0.0064304	0.000899456	0.000489963	0.00044027	0.000793066	67.1698	26.8554	16.0369	11.9176	9.03184	159	121.5	80	26.5	20	0.00567365	0.00127628	0.000649047	0.000625991	0.000736249	67.5858	32.6067	15.9398	12.7783
	59.0587	17.8277	10.8681	8.04214	5.3249	218.5	121	46.5	30	19.5	0.00510173	0.000565965	0.000431515	0.000381431	0.000264392	61.6308	21.2718	13.2909	9.09875	7.18526	164	114.5	59.5	32	20.5	0.0051986	0.000732762	0.00046364	0.000492357	0.00049969	61.9799	25.7051	16.0097	10.8781	8.29754	165.5	117.5	75.5	24.5	15	0.00482111	0.00110832	0.000800133	0.000678504	0.000636425	61.4389	31.3113	17.2645	13.4811
	59.6048	16.5305	10.6237	7.34814	5.80758	213.5	100	66.5	28.5	17	0.00575025	0.000619119	0.000380982	0.000355373	0.000352405	60.8893	21.7461	12.3119	9.62438	7.00093	207.5	106	67.5	44	19	0.00538561	0.000882845	0.000465508	0.000445648	0.000452438	62.2915	26.6832	14.927	10.571	8.38738	158	189	60.5	41.5	17	0.00519245	0.000920217	0.000567126	0.000532009	0.000718805	63.1842	30.9345	16.4598	12.3562
	58.386	16.368	10.3858	8.00027	6.01073	213	66	68.5	25.5	14.5	0.00510504	0.000590656	0.000337625	0.000324115	0.000495249	59.5844	21.462	12.8731	8.42355	6.08133	212	120.5	32.5	27.5	13.5	0.00558026	0.000874003	0.000801256	0.000428694	0.000460667	61.1711	25.7429	15.3583	11.1987	8.5545	209	122.5	76	19.5	20.5	0.0054432	0.000945973	0.00073137	0.000672477	0.000563462	62.1231	29.525	17.4641	12.368
	58.7477	15.4694	10.0674	6.72423	5.28067	206.5	105	55	23.5	14.5	0.00538827	0.000491936	0.000314465	0.000248673	0.000376003	59.6335	21.9901	12.3517	8.9282	6.83034	211.5	119	50	42	16.5	0.00510988	0.00119471	0.000467475	0.000377406	0.000491764	60.0494	27.3624	15.6519	11.5365	7.79697	163.5	123.5	81	30	17	0.00455364	0.00109478	0.000656681	0.000758052	0.000602949	60.3145	31.7913	17.5859	11.4242
Degumed	21.6124	12.1899	9.5532	7.51485	5.43356	221.5	168.5	91	43.5	23	0.000297216	0.000211924	0.00021542	0.000249655	0.000202039	25.9241	16.0379	11.6347	8.99387	6.28102	238.5	178.5	83.5	41.5	20.5	0.000419098	0.000305096	0.000329346	0.000372233	0.000323435	30.008	18.9844	14.0126	10.3751	7.9466	253	215.5	59.5	43	27	0.000558708	0.000430181	0.000443849	0.000366053	0.000543655	35.2056	20.8728	15.5677	11.3119
	21.5743	12.1495	9.59162	7.36781	5.46288	222	163	80	46.5	30.5	0.000345899	0.000207682	0.000232791	0.000235049	0.000182328	26.113	15.9239	11.785	8.88706	5.91809	220.5	169.5	85.5	42.5	20	0.000424758	0.000331343	0.000308127	0.000344196	0.000269473	30.4369	19.2946	13.8035	10.4246	7.24756	254.5	158.5	89	35	19	0.000630263	0.000471812	0.000418074	0.000451074	0.000422332	35.2614	20.2835	16.3014	11.6652
	20.9113	12.5851	9.88584	7.94935	5.69044	245.5	169	74.5	51	17.5	0.000320749	0.000200723	0.00019432	0.000224791	0.000252831	26.0089	15.6794	11.9505	9.54757	6.19981	240	173	78	39.5	20	0.000411787	0.000334393	0.000319548	0.00040188	0.000366973	30.0945	19.5609	13.4412	10.1906	7.58279	249.5	165.5	81.5	51.5	29.5	0.000684125	0.000454886	0.000397731	0.00041655	0.00048879	35.2536	20.9478	15.4263	11.5982
	21.2624	12.517	9.66935	7.79329	5.3316	173.5	168.5	98	44	23.5	0.000288387	0.000190971	0.00022152	0.000321425	0.000176427	26.0418	16.1017	11.7269	9.08649	6.14382	246.5	159	77	39.5	22	0.000418238	0.000343354	0.000322271	0.000374962	0.000280378	30.0336	18.4781	13.625	10.7835	8.21413	263.5	175	102.5	33.5	16.5	0.000558009	0.000393982	0.00034788	0.000409969	0.000431872	35.27	20.9447	15.621	11.0983
	20.7589	13.3581	9.92172	7.81385	5.45547	246.5	160	95	55	15.5	0.000303524	0.000231873	0.000211579	0.000232127	0.000227846	26.0345	15.5993	11.8149	9.149	6.56276	240	127	79.5	42	26.5	0.000422092	0.000364391	0.000336842	0.000343138	0.000329765	30.5287	18.9201	13.4812	10.066	7.50411	220.5	151	57.5	50.5	31.5	0.000613157	0.000404693	0.000394286	0.000496685	0.000372343	35.1657	19.7586	15.5993	12.1046
	21.5662	12.6609	9.45467	7.1964	5.20942	230.5	110.5	77.5	47	24	0.000297881	0.000243092	0.000356434	0.00024006	0.000190683	26.0855	16.0573	12.0044	8.71648	6.29991	241	63	84.5	39.5	16.5	0.000396135	0.000415355	0.000361165	0.000388104	0.000334035	30.38	19.3242	13.467	10.0847	7.40707	258	129.5	95.5	37	25	0.000649685	0.00044381	0.000378285	0.000438584	0.000491272	35.3136	20.6392	15.6451	10.9612
	21.7302	11.6379	10.1807	7.12666	5.30551	250	164	99	47.5	25	0.000335244	0.000184976	0.000234141	0.000247279	0.000249191	26.0474	16.0522	11.7479	8.74375	6.4578	259	120.5	76.5	39	19.5	0.00046717	0.000300964	0.000336713	0.000363838	0.000288668	30.4952	18.907	13.7701	10.2723	7.4713	250	135	96.5	35.5	21	0.000567231	0.000438701	0.000499985	0.000462369	0.000380624	35.2676	21.1724	15.7285	10.9192
	21.2478	13.0157	9.69228	7.16075	5.52767	249.5	167	78	48	24	0.000302092	0.00021979	0.000272105	0.000247368	0.000228452	26.0293	15.8058	11.5305	8.70333	6.43314	239.5	104.5	79.5	39	30	0.000453739	0.000379956	0.000270283	0.000339106	0.000304863	30.4789	18.7762	13.4705	10.6715	7.31804	248.5	168.5	94.5	50	28.5	0.000559255	0.000466638	0.000437543	0.000494948	0.000370325	35.2816	20.2745	15.3836	11.9127
	21.2661	12.9102	9.5025	7.30126	5.55667	255.5	163	92.5	46.5	20	0.000334999	0.000256722	0.000214408	0.000218892	0.000257878	26.1266	15.7778	11.4996	8.64718	6.63541	249.5	124.5	84	43.5	30	0.000393044	0.000305592	0.000335438	0.000295635	0.000264331	30.1274	19.4728	14.0972	9.81183	7.7575	243.5	166.5	71	43	23.5	0.000598264	0.000451714	0.000441829	0.000432721	0.000497273	35.118	20.3354	15.9477	11.8409
	21.1939	13.034	9.83113	7.11219	5.34275	250.5	171	83	46	25	0.000251003	0.000210313	0.000233243	0.000224706	0.000218003	25.9743	15.9574	11.9472	9.1211	6.18854	242.5	128	82	36.5	21	0.000431589	0.000322862	0.000298246	0.000323616	0.000287004	30.5535	18.8572	13.4841	10.7341	7.09331	245	147.5	87	44	17.5	0.000562334	0.000463454	0.000462657	0.000397821	0.000371976	35.2283	19.8065	15.741	12.2121
	21.6583	12.3017	9.76219	7.14077	5.40946	237.5	116	82	52.5	23	0.000297251	0.000220712	0.000225493	0.000228681	0.000215527	25.975	16.0929	11.9187	8.9667	6.36144	249	94	76.5	36.5	18.5	0.000421585	0.000356511	0.000308256	0.000334929	0.000268837	30.5021	18.5056	13.0885	10.8964	7.80364	215.5	159.5	84.5	42	26.5	0.00059662	0.000420216	0.000346425	0.000444439	0.000413197	35.2607	20.6155	16.0644	11.5538
	21.2337	12.3986	9.90159	7.86116	5.35755	247.5	183	67.5	42	25.5	0.000278441	0.000211078	0.000210462	0.000241618	0.000257045	26.1365	15.719	11.6328	8.70135	6.09788	266.5	128	78	41.5	24	0.000379719	0.000284114	0.000313545	0.00027411	0.000314506	30.3193	19.121	14.0854	9.92379	7.82788	254.5	128	79	45.5	29.5	0.000645936	0.000438952	0.000462849	0.000428353	0.00048139	35.4465	20.7039	15.5721	11.4154
	20.7707	13.188	10.298	7.57179	4.94853	232	159	82.5	52	25	0.000242012	0.000200647	0.000273771	0.000269755	0.000176809	26.1802	15.7443	11.6626	9.1406	5.97758	247.5	146	43.5	36.5	20	0.000447487	0.000344924	0.000287027	0.000324799	0.000312739	30.6012	18.5557	13.0673	11.0008	7.42249	234	162.5	80.5	53	23	0.000673318	0.000438392	0.000395193	0.000434045	0.000397491	35.1522	19.8855	15.1496	12.5912
	21.2249	12.4545	9.81084	7.40846	5.68288	247.5	136	97.5	46	20	0.000274315	0.000229166	0.000194027	0.000204567	0.000212384	26.0263	15.6356	11.7338	9.11146	6.17099	174	158.5	116	51	30	0.000423382	0.000286175	0.000266816	0.000323972	0.000229336	30.0843	19.069	12.67	10.18	8.74432	215.5	93.5	95	49	30.5	0.000541494	0.000432323	0.0003006	0.000336898	0.00043142	35.1685	19.239	15.885	12.0579
	21.1793	12.9764	9.42924	7.68815	5.85774	258	177	68	44	22	0.000263317	0.000202771	0.000208108	0.000295462	0.000222707	25.9888	15.9124	11.8961	9.5779	6.20661	221	111.5	79	36	14.5	0.000476902	0.000320135	0.000343525	0.000374072	0.000286542	30.558	18.7107	13.4169	10.4814	7.68387	250	134.5	83.5	41.5	27	0.000645399	0.000437464	0.000420201	0.000412844	0.000450545	35.2502	19.3824	14.6161	12.8535
	21.1834	13.3179	10.0848	6.88816	5.42024	259.5	160.5	98.5	43.5	21	0.000319463	0.000239107	0.000212279	0.000183221	0.00027126	26.1319	15.961	11.6007	8.53828	6.25965	243.5	128.5	69.5	39	22	0.000446104	0.000298676	0.000340924	0.000359517	0.000248853	30.574	18.8133	13.4497	10.4922	7.24219	234	155	83	44	23.5	0.000555963	0.00052816	0.000426823	0.000480073	0.000397686	35.293	19.8725	15.6085	12.2151
	21.09	12.7513	9.62235	7.54445	5.71571	246	162	78.5	43.5	22	0.000301126	0.000261998	0.000302211	0.00024829	0.000189684	25.9817	16.5482	10.5095	9.24879	6.46097	220.5	151.5	78	41	33	0.000461217	0.000391562	0.000235778	0.000316964	0.00025337	30.3037	19.201	13.5658	9.86496	7.86353	250	164	60	31.5	29.5	0.000809019	0.000434633	0.000494197	0.000331564	0.000446449	34.8945	20.8669	14.9175	12.2338
	21.0202	12.4747	9.90991	7.93204	5.45257	249	169.5	90.5	54.5	26.5	0.000271715	0.000195349	0.000200845	0.000222487	0.000205888	26.1531	15.6837	11.9442	9.20416	5.98365	247	129.5	82	23	20	0.000438739	0.000362607	0.000340704	0.000376733	0.000269231	30.3879	19.0276	13.1997	11.0916	7.64636	249.5	159.5	54	44.5	27.5	0.000606009	0.000448268	0.000351885	0.000533438	0.000495115	35.2277	20.9487	15.421	11.1644
	21.2542	12.4413	9.75014	7.65529	5.7796	228	174	100	47.5	28.5	0.000284713	0.000201841	0.000208129	0.000269282	0.000198991	26.0957	15.9746	11.8614	8.52031	6.45387	250	94.5	72.5	39	19	0.000453968	0.000397835	0.000305573	0.000429111	0.000337982	30.5068	18.8139	13.8518	10.1488	7.23827	254.5	169	80.5	40	22	0.000602588	0.000442306	0.00046797	0.000452697	0.000474939	35.2277	20.8048	15.7738	10.3715
	21.1391	12.7501	9.98503	6.78655	5.84468	249	124.5	76	44.5	34	0.000299981	0.000201718	0.000257455	0.000182681	0.000210764	26.009	16.0631	11.6091	8.94235	6.02183	220.5	118.5	75.5	37.5	20.5	0.000535997	0.000352	0.000347895	0.000315951	0.000247451	30.803	19.1541	13.5204	10.1657	7.56186	246.5	166.5	67	24.5	23	0.000657865	0.000456807	0.000415673	0.000504569	0.000542726	34.8409	20.9067	15.9114	12.0097
The new data：
	0.55dBW noise															0.65dBW noise															0.75dBW noise															0.85dBW noise
	SVD values					Hilbert marginal spectral characteristics										SVD values					Hilbert marginal spectral characteristics										SVD values					Hilbert marginal spectral characteristics										SVD values
Normal	79.9296	46.5289	25.0086	17.9943	13.4098	157	224	87	49.5	26	0.00737695	0.00304022	0.00143509	0.00135251	0.00151041	86.1771	49.1205	29.7098	21.5422	15.633	197.5	182	79.5	30	16.5	0.00761404	0.00323325	0.00249751	0.00192965	0.00165356	88.4983	55.4277	34.5219	23.0108	18.7582	154.5	179.5	86	50	27.5	0.00870263	0.00471784	0.00263437	0.00250229	0.00226807	94.2355	59.319	33.4754	26.0851
	91.6748	41.8134	24.5445	16.0751	13.2018	159	122.5	60	35.5	15	0.0107556	0.00279455	0.00210285	0.00174536	0.00146083	90.9324	50.5873	27.638	19.9426	14.4913	164.5	174.5	78	36	23	0.0097103	0.00336324	0.00173574	0.00177966	0.00209241	95.2391	54.7049	33.4324	22.9639	16.4214	155.5	179.5	63	48	31	0.00994004	0.0043561	0.00323007	0.00215903	0.00200402	101.362	59.9953	32.7686	25.4233
	86.2606	50.347	25.4213	18.4236	13.2896	153	188.5	85	33	18.5	0.0102398	0.00354871	0.00141364	0.00144442	0.0018241	92.7809	53.0935	29.2884	18.9984	16.1289	165	178	63	39.5	31	0.011369	0.00364857	0.00191426	0.00162591	0.00147543	94.6843	59.533	34.1658	23.7979	18.593	165.5	173	81.5	38	21.5	0.0086113	0.00594752	0.00248751	0.00235867	0.00230451	102.552	61.2836	36.1157	24.9307
	94.6355	42.3046	24.7989	19.2071	14.8112	208.5	125	71	39.5	15.5	0.0117718	0.00205168	0.00155853	0.00166603	0.00187828	97.1273	49.1973	29.7362	20.2472	14.5473	166	185	79	28	16.5	0.0100909	0.00328258	0.0024027	0.00168328	0.00306545	101.709	56.1641	32.969	24.1529	17.1347	165	185.5	82	42	16	0.0118802	0.00443483	0.00293001	0.00320907	0.00233146	105.774	58.4851	33.889	25.6984
	92.4944	50.4416	25.7988	19.7175	14.3183	162.5	180	77.5	39	17	0.0120535	0.00290978	0.0016376	0.00158514	0.00225872	95.6732	54.4611	30.7992	21.4024	14.9465	162.5	178.5	41	52	17	0.0134228	0.00423139	0.00256201	0.00216414	0.00186161	100.639	59.0892	34.4228	23.5159	19.0906	165	181.5	81	54.5	21	0.0107684	0.00470883	0.00245613	0.00224314	0.00320034	103.751	62.3021	35.7451	24.9361
	97.0994	43.9151	26.1271	17.2523	13.189	163	121	78	51	24.5	0.0118664	0.00246482	0.00195793	0.00123265	0.00115765	103.347	48.1999	31.2688	20.5789	16.3823	212.5	122	81.5	32	24	0.0132922	0.00438677	0.00278609	0.00208841	0.0023887	103.382	56.6116	33.7171	23.15	18.1386	161	177	78.5	17.5	31.5	0.0127841	0.0050257	0.00277133	0.00233695	0.0021947	107.266	60.1121	36.2359	24.5575
	97.0524	50.799	27.3073	20.2697	15.9317	159	179.5	87.5	48.5	25.5	0.0134574	0.00330168	0.00195934	0.001575	0.0018939	104.383	52.658	29.196	20.3486	14.2523	159	174.5	81.5	28	18.5	0.0156579	0.00337469	0.00239198	0.00215941	0.00187533	106.326	59.2963	34.7581	24.1914	15.8296	158	224.5	79	39	21	0.0151164	0.00407195	0.00264353	0.0023932	0.00191576	109.698	60.7606	34.3464	25.8625
	99.9518	42.4066	24.4027	17.1565	13.7097	207	120	76.5	39	14.5	0.0119171	0.00320257	0.00181005	0.00131828	0.00141	100.232	48.887	28.5118	19.1864	13.8784	181.5	179.5	69.5	38.5	21	0.0124451	0.00308404	0.00227136	0.00193851	0.00150218	105.187	55.9118	33.6691	23.9018	17.2904	204.5	173	78.5	41	17	0.0148621	0.00412308	0.00302535	0.00262036	0.00243528	107.183	61.4055	37.156	25.9366
	93.9037	47.0476	26.0441	17.236	13.2997	165	178	73	36	17.5	0.0110694	0.00307917	0.0017396	0.00154689	0.00159858	95.6811	51.4603	28.0845	20.9878	14.3584	204.5	220.5	37	48	18	0.0124058	0.00329294	0.00187624	0.0018821	0.00148963	101.716	55.8607	33.4647	23.3024	17.2059	204	178.5	81	41.5	24.5	0.0110747	0.00406588	0.00311904	0.0026679	0.00300435	102.399	62.3263	38.8442	23.1307
	98.5642	40.1013	24.9789	17.0507	12.5661	209.5	128	80	40	16.5	0.0134377	0.00261187	0.00165159	0.00184967	0.00198937	100.713	46.267	26.3258	21.5858	15.7882	213	123	90.5	40.5	17	0.0130864	0.00293457	0.00187151	0.00216297	0.00221264	104.652	54.8174	33.7661	22.9362	17.981	160.5	116.5	71	35	22	0.012923	0.00389888	0.0033366	0.00211451	0.00268925	101.945	63.1711	35.27	25.4712
	91.8092	45.833	25.6167	18.7946	13.268	202.5	116.5	72.5	37	23	0.0114945	0.00284797	0.0014335	0.00163633	0.00134348	95.2619	50.6407	29.8788	20.7174	15.1532	162.5	181	79.5	40.5	21	0.0115058	0.00344881	0.00214632	0.00215843	0.00236116	101.631	55.0256	32.902	24.0515	17.3848	154	187.5	80	44.5	20.5	0.0125998	0.00364922	0.0026816	0.0022316	0.00216754	104.933	57.5485	36.8776	24.6972
	97.6809	40.117	24.9268	18.0717	11.8942	165.5	119	46	37.5	10	0.0136466	0.00306346	0.00188367	0.00158099	0.00153674	101.104	46.3373	27.7649	19.8175	15.3937	209.5	120	78	39.5	20	0.0144708	0.00336809	0.00218473	0.00188495	0.00204158	100.22	56.8972	32.1706	23.3495	16.233	157	176.5	71.5	48	22	0.0119017	0.00419192	0.00279956	0.00242679	0.00224923	105.792	60.1888	37.2528	23.1475
	97.0266	42.4004	25.301	18.4479	11.4456	160.5	120.5	54	32	17.5	0.0158711	0.00326984	0.00162183	0.00181841	0.00134094	97.3045	50.1783	28.7248	21.3889	14.652	158	178	69.5	43.5	19	0.0108123	0.00336267	0.00246071	0.00262742	0.00220571	103.41	52.8843	35.8064	24.5113	17.1905	161	127.5	59.5	40.5	27.5	0.0116714	0.00333083	0.0029938	0.0020907	0.00196963	110.57	57.3692	33.2701	25.4027
	98.0271	38.5894	24.4292	17.2597	11.5923	210	116	62.5	30.5	12	0.0126976	0.00266103	0.00179099	0.00149994	0.00137054	102.359	45.4766	28.3575	18.7345	14.6659	163	122	24.5	36	11.5	0.0140182	0.00451459	0.00227579	0.00206605	0.00191456	99.1027	56.0405	33.5887	24.1558	17.5844	199	171.5	76.5	23	18	0.0109371	0.00389462	0.00296877	0.00256859	0.00191972	108.23	59.3097	35.822	23.0042
	82.4656	41.1084	26.2512	18.4933	12.6888	195	118.5	82.5	38	17.5	0.00800765	0.00240933	0.00176912	0.00217275	0.00151673	87.9665	45.9974	27.956	21.5759	16.9517	159.5	120.5	52.5	47	25	0.0111388	0.00334717	0.00223935	0.00169088	0.00264132	90.8124	53.1753	32.9553	21.1442	16.8122	158	184.5	72	44	24.5	0.00811121	0.00414554	0.00263653	0.00193496	0.00209454	96.3949	58.2185	36.1352	23.3178
	95.7542	37.9024	22.8451	16.9412	14.2624	159.5	120.5	58.5	39	18.5	0.0116496	0.00313633	0.00148593	0.0012704	0.00165362	95.5204	45.5691	29.11	19.4894	16.5644	160	122	78.5	33	20.5	0.0112523	0.00271248	0.00236572	0.00164867	0.00197467	98.8949	54.0407	34.9004	23.2709	16.4134	201.5	216	88	20	17.5	0.0105059	0.0040523	0.00300319	0.00250973	0.00209443	104.386	58.9298	35.1698	25.1028
	85.7728	40.4784	24.5529	17.4051	14.3977	202	120	69.5	38	17	0.0084103	0.00208566	0.00163395	0.00131893	0.00147167	87.8218	47.1188	27.659	20.7147	14.232	201.5	174	83.5	53.5	21	0.00950159	0.00288452	0.00205931	0.00195172	0.00141724	93.5926	51.479	31.7349	23.0811	16.0087	209	179	82	32	19.5	0.0113211	0.00368532	0.00239915	0.00237769	0.00179694	98.0814	56.3885	33.6705	26.0749
	89.5774	41.7298	23.4582	17.35	12.7293	160.5	121.5	84.5	31	16.5	0.00954765	0.00287506	0.00147951	0.00157892	0.00140971	94.6961	46.1082	29.5426	19.9099	14.1785	162	127	69	33	12	0.0109706	0.0032109	0.00307354	0.0018405	0.0017454	93.8831	56.4051	32.6714	23.6869	16.9523	207	185.5	78	43.5	23	0.00988866	0.00408842	0.0026751	0.00222078	0.00188926	100.445	57.8436	35.999	24.973
	93.0726	40.1534	23.9135	16.8188	12.2976	212	114.5	63	42	24	0.0107268	0.00201248	0.00158151	0.00133678	0.00116204	97.1623	46.996	28.7271	19.1882	13.9011	157.5	122	73.5	25	9	0.013737	0.00273509	0.00263692	0.00186472	0.00165859	100.828	52.4316	31.1753	22.6531	15.7888	165.5	116.5	83	36	11	0.0122461	0.0046562	0.00277551	0.00237523	0.0018584	101.858	60.9989	36.7161	24.8917
	86.8361	40.7366	22.8795	17.1199	12.9989	167	128.5	80.5	38	15	0.00830192	0.00224411	0.00146837	0.0015765	0.00116355	88.5138	46.6531	26.9842	18.176	15.3557	155.5	127.5	76.5	46	26.5	0.00902583	0.0035402	0.00220274	0.00158668	0.00192008	93.7723	53.1961	33.3743	23.0185	15.1654	164.5	126	40.5	44.5	23	0.00902941	0.00356524	0.0032238	0.00241787	0.00250588	98.6776	57.5341	33.0098	26.0092
Broken	67.9314	39.0123	24.2613	16.524	12.7741	165	177	74.5	41	21	0.00591596	0.00225924	0.001708	0.00115718	0.00125107	70.9295	44.908	27.2481	20.9335	13.7615	158	176	112	47	23	0.004797	0.00276216	0.00166493	0.00177299	0.00166136	80.6543	49.4932	30.1566	23.5389	16.2458	166	183.5	94.5	38	26	0.00669466	0.00289462	0.00223981	0.00226978	0.00200399	86.1215	52.4167	35.033	25.5476
	70.9151	45.0345	23.6444	18.29	13.477	162.5	172.5	75	51.5	15.5	0.00776219	0.00284217	0.00128326	0.00148854	0.00115956	74.3318	51.4554	27.8787	19.0368	16.3982	159	216	64.5	58.5	12	0.00496589	0.00344113	0.00193433	0.0014035	0.00220927	83.5161	50.7129	32.0346	22.6975	17.6485	158.5	177	91	49.5	31	0.00590734	0.00334878	0.00217631	0.00234883	0.00228883	92.9702	54.6297	34.1486	25.172
	77.2421	44.119	25.4879	17.7048	11.743	162.5	218.5	69.5	31.5	14	0.00775962	0.00262316	0.00187649	0.0012696	0.000931771	84.1821	45.6813	26.2057	20.2682	15.4115	159	172	63	47	15	0.0081339	0.0026677	0.00191216	0.00147852	0.00156968	89.6532	51.7037	33.3537	22.7056	16.4032	164.5	175	57.5	41.5	21.5	0.00704508	0.00352971	0.00294249	0.00211984	0.00190418	91.9525	55.7565	34.8944	27.1391
	75.375	45.0308	24.1637	18.6149	14.2353	212	172	78	44.5	23	0.00605147	0.00260518	0.00149012	0.00134017	0.00146438	79.3855	48.5319	30.0446	20.1351	13.8014	217.5	220	85.5	48	17	0.00671001	0.00358898	0.0018982	0.00182295	0.00165904	92.5605	48.9882	32.3344	22.8417	16.1895	158.5	124	53	25	22	0.0103446	0.00305191	0.00227279	0.00330843	0.00194514	92.7859	56.0389	33.2788	26.8077
	77.9035	46.3596	25.7255	17.6296	13.5863	160	185.5	50	51.5	23.5	0.0077275	0.00358446	0.00173174	0.00117478	0.00151873	82.5742	48.54	28.4813	19.1523	15.5408	173	221	83.5	42.5	22.5	0.00755404	0.00316307	0.00202	0.00156108	0.00199231	90.4539	51.8494	32.7394	24.9055	16.429	174.5	181	104.5	38	29	0.0077566	0.00373025	0.00245185	0.00221813	0.00229319	94.1774	59.0662	36.0046	26.1058
	79.3344	43.5858	23.2709	17.0827	13.9169	164.5	176.5	61	45.5	25.5	0.00717325	0.00279801	0.00129102	0.00130856	0.00160043	81.6867	48.4651	26.194	19.4609	14.3549	163.5	182.5	85	47	22.5	0.00810494	0.0029607	0.00153046	0.00174151	0.00158093	87.7648	53.2247	32.915	21.8812	16.8858	173	180.5	97.5	39.5	19	0.00685406	0.00411568	0.00271119	0.00222013	0.00209976	91.93	58.0859	34.9844	26.1859
	77.8194	43.9128	24.3881	17.5644	12.2304	164.5	114	72	37.5	20	0.00699402	0.00260394	0.00158253	0.00156499	0.00115959	80.1077	47.9226	28.0604	21.5818	14.6594	206	175.5	86.5	52	18	0.00616008	0.00351378	0.00149355	0.00165749	0.00161995	87.3875	52.1464	33.0056	24.6627	16.7353	156.5	182.5	99.5	50.5	25.5	0.00688693	0.00345277	0.00286441	0.00225478	0.0018289	92.0133	58.0606	34.7833	25.2921
	75.586	45.8079	25.4621	18.3933	12.2537	163	185	97.5	39.5	30	0.00632107	0.00303219	0.00169411	0.00159834	0.00101012	82.0651	48.2417	28.3908	18.4247	14.4013	158	176.5	88	32	21	0.00850307	0.00307775	0.00207835	0.0015526	0.00187527	89.6844	53.0441	31.3258	23.2388	15.9655	174.5	174	80	30.5	26.5	0.00680546	0.00360644	0.00221624	0.00233816	0.0020162	93.6187	54.8423	35.2031	26.5655
	75.4679	44.0812	22.4815	18.9015	14.2006	163	181.5	83	45.5	24.5	0.00723841	0.00274966	0.00115516	0.00158208	0.00138536	79.0256	48.7143	28.4257	19.5168	15.9176	167.5	181.5	97.5	49.5	20	0.00610737	0.00307756	0.00187642	0.0015583	0.00212195	87.5298	53.3151	31.972	22.1162	17.5146	169	182	92	44	27	0.00701601	0.00433045	0.00271868	0.00267012	0.00200292	94.2882	54.0527	32.203	25.704
	74.5797	42.9301	22.9119	18.0914	13.2283	159.5	173	79	33.5	31	0.00565528	0.002426	0.0014096	0.00116869	0.0011011	80.1527	45.2511	28.1845	20.4192	14.7816	205.5	187	86.5	24	23	0.00790481	0.0027329	0.00161186	0.00183598	0.00183919	86.8178	50.4925	33.2035	23.4122	17.4471	159.5	179	78.5	39	19	0.0087524	0.00350795	0.00283053	0.00253575	0.0018848	89.3668	58.0575	32.1193	26.9688
	74.4875	43.61	23.4717	17.2086	12.8535	158.5	178.5	81.5	39.5	19.5	0.006273	0.00292941	0.00140027	0.0011462	0.00170662	79.5413	47.3572	26.4715	19.5538	14.0766	155.5	215	81.5	33.5	21	0.00698101	0.00306179	0.00176448	0.0018201	0.00157916	86.2856	52.0347	31.6495	24.071	16.6343	159.5	176.5	80.5	47.5	26	0.0102137	0.00351149	0.00357982	0.00296457	0.00208326	89.3622	57.673	33.9201	27.7193
	70.2769	42.225	24.6491	17.2934	12.346	158	172	71	39.5	24.5	0.00515221	0.0024364	0.00142333	0.00142409	0.00136977	78.1137	43.291	26.3947	20.3549	14.2298	159	176.5	77.5	47.5	20.5	0.00706764	0.00311232	0.00193949	0.00177677	0.0018353	83.1578	49.0252	31.7109	22.9103	16.9349	157	175	90.5	43.5	32	0.00585429	0.00368269	0.00239178	0.00226834	0.00209097	93.4669	50.0112	35.1662	25.0684
	75.37	42.7773	22.914	17.7122	12.8986	160	178.5	79	33	20	0.00608781	0.00223463	0.00148291	0.00172857	0.00138155	82.6345	46.2878	27.2485	18.5473	14.9341	161.5	181.5	75	51.5	23.5	0.00758733	0.00270203	0.00187979	0.00157251	0.00182975	87.737	51.2233	29.145	22.677	15.8655	158	176.5	84	46	22.5	0.00867951	0.0038764	0.00218674	0.0021408	0.00201675	92.3773	55.9074	32.8101	23.1039
	70.5745	41.172	23.7698	18.4671	13.2779	204.5	176.5	93.5	35	24.5	0.00545557	0.00218839	0.00135445	0.00116184	0.00175213	76.5714	45.4989	28.0476	20.7192	13.8698	159	184.5	90	27.5	21	0.00570659	0.00269482	0.00198921	0.00224462	0.00158915	80.9976	49.8	34.6067	22.509	17.4541	158	177.5	101	28.5	31.5	0.00624272	0.00307648	0.00292949	0.00226095	0.00260131	91.4237	52.9368	32.196	24.4185
	70.573	41.057	24.4474	17.2145	13.452	153	175	70	40	21.5	0.00616732	0.00216105	0.00139679	0.0020273	0.00124533	76.745	45.8776	28.1531	19.6562	12.7555	168	184.5	76.5	34.5	17	0.00749668	0.00315428	0.00281188	0.00182504	0.00164072	80.6994	50.7804	30.2187	24.0256	15.6147	206.5	177	99.5	54	26	0.00599652	0.00409871	0.00235516	0.00218363	0.00157736	90.5067	52.9411	34.1034	24.793
	72.6769	39.0008	24.9764	16.5043	11.3882	161.5	184.5	96	37	23	0.00596703	0.00188687	0.00153294	0.00146238	0.00125323	76.6237	44.2467	27.8012	20.3435	15.3501	166.5	122	78	30	18	0.0058845	0.00277132	0.00162151	0.0021161	0.00186572	83.3154	50.5639	30.3554	22.7356	16.4516	171	181	84	42.5	28	0.00719687	0.00366858	0.00240693	0.00197676	0.00207265	88.7668	53.5695	33.6388	24.5484
	69.8249	38.4348	22.1626	16.4324	13.3435	159	168	65	38	5	0.00597191	0.00212243	0.0013267	0.00112589	0.00195187	71.8554	43.3975	28.3107	19.2873	15.0013	159.5	174	82.5	45.5	26.5	0.00500937	0.00264577	0.00224603	0.00156764	0.00149058	79.3641	48.4225	31.1675	22.797	16.4161	151.5	172.5	95.5	26	18	0.00615029	0.00284062	0.00219349	0.00177763	0.00182443	86.0747	51.0954	33.528	25.4955
	66.8699	39.1739	22.0688	18.0198	12.1473	174.5	216.5	76	42.5	19	0.00453763	0.00200275	0.00133509	0.00138192	0.001401	72.3964	43.0298	28.0404	18.834	16.7794	173.5	181.5	101	60	20	0.00549896	0.0021445	0.00177743	0.00126943	0.00184425	81.8735	49.5079	28.8297	21.9842	16.1078	161	179	80.5	30	14	0.00604737	0.00313158	0.00213204	0.00199075	0.00222529	86.2173	50.1558	34.4397	25.988
	64.3719	40.027	23.0678	16.6594	11.9188	158.5	180	87.5	39.5	26.5	0.00448348	0.00243788	0.00120974	0.00147636	0.00119879	70.848	42.893	27.2336	19.6594	14.7707	210	186	76.5	45.5	19	0.00524661	0.00259636	0.00169372	0.0021651	0.00180156	79.7534	48.2549	31.4024	23.0206	16.7023	160.5	88	69	45.5	17.5	0.00650928	0.00281691	0.00238626	0.00229818	0.00297772	84.5196	50.4611	34.2947	26.2131
	65.9366	38.4093	23.0966	16.8501	12.7999	167.5	219.5	67.5	38.5	17	0.00456978	0.00180555	0.00117181	0.00132657	0.00152566	73.2315	42.211	28.0123	21.1477	13.7123	201.5	174.5	60.5	48	25.5	0.00484104	0.0023061	0.00206554	0.00184377	0.00153862	80.4578	47.0848	31.1662	22.6486	15.4653	212.5	180	79	45	15	0.00605451	0.00257381	0.00274513	0.0028183	0.00193658	83.9716	51.7503	33.9419	24.7501
Degumed	45.5281	28.2507	23.7038	15.6559	13.3421	255	127	82	46.5	27.5	0.00192099	0.00105031	0.00121919	0.00104222	0.00155121	55.5662	34.1696	26.2338	17.0931	13.6209	238	125.5	76.5	43	22	0.00213175	0.00147459	0.00213852	0.00110757	0.0014689	65.834	38.4933	28.0378	21.7642	15.9614	253	170.5	79	48.5	24	0.0030334	0.00189724	0.00201365	0.00208913	0.00208501	73.2505	44.043	30.5766	22.7353
	46.2939	27.4236	23.7411	15.7521	12.3682	257	115.5	96.5	32	22.5	0.00144434	0.000911078	0.00146902	0.00119341	0.0012067	55.5345	34.3898	25.7911	16.912	13.23	239	175	77	41	24	0.00173918	0.00170089	0.00173106	0.00123464	0.00141666	65.8838	39.6888	28.6542	21.8486	15.1737	250.5	125	77.5	37.5	13.5	0.00277675	0.00206538	0.00235842	0.00188906	0.00201679	73.7957	42.5453	31.8203	23.9732
	45.6974	28.5912	23.5355	15.0678	13.2279	254	144	69	47.5	17.5	0.00132785	0.000969746	0.00119027	0.0010494	0.00121766	55.3819	33.2057	25.6589	19.5248	14.1691	248.5	160.5	86.5	46	24.5	0.00192356	0.00149527	0.0015067	0.00151285	0.00173011	64.7855	39.9927	28.4557	22.0545	15.03	248	125	85	42	24	0.00269555	0.00229269	0.00205971	0.00211226	0.00147477	73.227	42.1745	32.1694	24.6534
	45.6428	28.7954	23.6878	16.3985	11.3114	246.5	170.5	83.5	46.5	20.5	0.00146155	0.00110467	0.00120477	0.00128776	0.00113904	55.5522	33.44	23.5195	19.1549	15.4357	238	177.5	82.5	47.5	30	0.00222762	0.00157619	0.00107738	0.00155202	0.00176001	65.7468	38.5107	28.0431	21.8896	16.243	251	124	85.5	42	27	0.00285584	0.00186412	0.00195127	0.00218439	0.00198183	73.6447	41.2456	32.6058	24.1448
	46.2465	28.0527	22.354	16.6547	12.9661	249.5	184	87	48	28.5	0.00139157	0.000920027	0.00107532	0.000999155	0.00112414	55.4296	32.9653	25.9696	19.6167	14.238	236	126.5	98	45	12.5	0.00202592	0.00164842	0.00140219	0.00152553	0.00169791	65.8789	38.9802	27.9494	21.0096	16.43	251.5	110.5	83.5	29.5	27	0.00390698	0.0017426	0.00174435	0.00205921	0.00211429	72.5911	43.9758	33.3591	22.8147
	46.2386	27.5698	22.5168	16.8059	12.919	257	115.5	97.5	49	23.5	0.0016063	0.00100658	0.00125666	0.00112763	0.00116271	55.562	34.3419	25.864	17.5428	13.142	238	169	77	39.5	22.5	0.00197026	0.00166381	0.0015888	0.00144777	0.00166875	65.9071	39.8487	28.609	21.1843	14.3548	251.5	161.5	80.5	27	19.5	0.00286242	0.00182802	0.00216892	0.0021513	0.00150726	72.9377	43.5674	32.7487	22.9531
	45.898	28.6889	22.8509	15.877	12.0941	254	166	99.5	45.5	28.5	0.00170447	0.0012847	0.00122892	0.0010586	0.00106287	55.5254	33.4178	23.3746	19.4358	15.5854	238	156	85	44	26.5	0.00208672	0.00146324	0.00115595	0.00138703	0.00165725	65.7621	38.5109	27.9966	21.6509	16.0301	251	161.5	82	52	26	0.00330357	0.00189909	0.0023055	0.00182216	0.00185205	73.0517	43.2907	32.9118	24.2125
	46.4253	27.8338	22.2681	16.1138	11.7699	250	142	97	40	29	0.00154244	0.00109389	0.00124674	0.001082	0.000965629	55.5173	33.4291	23.4259	19.6301	15.1205	221	173	82.5	50	24.5	0.00177027	0.00135303	0.00138146	0.0015105	0.00187508	65.7521	38.6846	27.585	20.9081	16.7571	251.5	161.5	91.5	34.5	26	0.00273949	0.00193192	0.00179416	0.00202474	0.00197077	73.7214	41.4435	32.9496	23.6871
	45.6858	29.5169	22.0826	15.6811	12.7386	255	160	71	45.5	28	0.00142826	0.00123041	0.0011031	0.00110194	0.00122518	55.0269	34.1024	26.3618	18.0241	14.2783	159.5	170.5	82	37.5	27	0.00186089	0.00170958	0.00171545	0.0015551	0.00158449	65.061	38.5087	28.4338	22.7857	16.2471	251.5	156	86	53.5	24.5	0.00318547	0.00195059	0.00228066	0.00184833	0.00216596	72.813	43.9987	33.0428	23.3227
	46.3297	27.7737	22.5576	16.2734	11.7838	254.5	104	97	39.5	29	0.00170424	0.00104051	0.00118663	0.00111372	0.00120064	55.5006	33.0586	25.9891	18.8662	13.6523	255	157	75.5	41	24	0.00196114	0.00177444	0.00178003	0.00163561	0.00164471	65.9376	38.5996	27.5632	21.4471	16.1784	252	157	46	50	27.5	0.00277157	0.00188134	0.00199013	0.0019128	0.00318167	72.7484	43.9443	33.3659	22.224
	45.5586	29.0895	23.0902	15.2922	12.2972	255	186	82.5	46	27	0.00169197	0.00112135	0.00142098	0.000893013	0.000965574	55.5732	34.306	26.165	17.6057	13.1455	254	157.5	60	25	22	0.00207557	0.00151778	0.00178672	0.00164443	0.00140036	65.6883	38.5215	28.3361	21.7989	15.9654	252	129	82	55.5	28	0.00302917	0.00207743	0.00208116	0.00184462	0.00189035	73.6212	41.1469	32.7059	23.9891
	45.6486	29.3419	22.4803	15.6045	12.7794	255.5	144	80	40	27.5	0.00139139	0.00129156	0.00163835	0.000976388	0.00152687	55.6927	33.5833	24.969	19.0554	14.021	218	171.5	81	46	21.5	0.00185997	0.00164576	0.00148258	0.00157551	0.00154634	65.9654	37.5401	29.4628	22.4611	15.4274	218.5	101	88	43	26.5	0.00280591	0.00187901	0.0024023	0.00215404	0.00186103	72.8257	42.7701	32.9602	24.367
	46.5468	28.2727	22.093	16.1757	11.5358	254	167.5	77.5	53	17	0.00181219	0.00100399	0.00149315	0.00113515	0.00110515	55.4499	32.8934	25.1017	18.8537	13.6274	249	166	95.5	49	18.5	0.00190836	0.00161127	0.00139438	0.00150371	0.00164003	65.6804	38.3034	29.3187	22.2237	15.4917	252.5	160.5	74	31	21	0.00314418	0.00184558	0.00209481	0.00304737	0.00165652	73.696	40.6372	32.0071	25.4178
	45.6537	28.1711	23.2997	16.3088	13.1388	255	173.5	99	47.5	23	0.00137224	0.00101682	0.00124655	0.00105195	0.00118414	55.6623	33.6018	25.5895	17.8158	13.8468	107	100.5	44	41	24	0.00186452	0.00132037	0.0016097	0.00135324	0.00178034	65.0103	39.1103	29.543	21.4467	15.8818	252	110.5	79.5	45	20.5	0.00314684	0.00209091	0.00212342	0.00213816	0.00179383	73.3165	42.8528	31.3511	24.4406
	46.4095	27.6185	22.6394	16.0213	12.5318	258	112.5	97	46	29	0.00147601	0.000917783	0.00117295	0.000991641	0.00105899	55.5202	33.5093	25.4963	19.4684	14.1666	249	158	64.5	48.5	17.5	0.00176674	0.00155758	0.00170454	0.0015554	0.00155209	65.5536	38.8033	28.6846	21.9373	16.1532	252.5	149.5	77.5	46	17.5	0.00304869	0.00221687	0.00245859	0.00183498	0.0019648	73.3143	41.6511	32.9267	23.537
	46.2236	27.9769	22.6814	16.323	12.6607	255	159	101.5	45.5	27	0.00147797	0.00090959	0.00107647	0.00124194	0.000946459	55.4203	33.1057	25.7877	18.4832	13.778	236	126.5	84	43	26	0.00205645	0.00142351	0.0015745	0.00136305	0.00144289	65.9289	38.5269	28.3729	21.4953	16.3519	252	157	54.5	46.5	15.5	0.00304886	0.00162246	0.00187579	0.00213407	0.00194014	73.6897	41.7168	33.8374	22.3953
	45.6199	29.4721	22.6192	15.5833	12.3712	255.5	131	71.5	53.5	26	0.00163651	0.0011547	0.00133645	0.00102489	0.00101279	55.6301	33.7169	26.0237	18.0144	13.9418	224.5	97.5	76	49.5	26	0.00192237	0.0013904	0.00160731	0.00137292	0.00147414	65.6286	38.4152	28.5406	21.8859	15.9894	252.5	150	76.5	44.5	26.5	0.00382704	0.00186744	0.00204134	0.00204293	0.00164637	73.2919	43.7565	30.7227	25.0732
	45.5411	29.8541	22.2751	15.5277	12.4676	255.5	160.5	71.5	39	21.5	0.00130974	0.0010149	0.00156488	0.00114544	0.0013409	55.5607	33.5497	25.8168	17.6831	14.0308	246	161.5	95.5	46.5	23	0.00189582	0.0014735	0.00166135	0.00138767	0.00139509	64.9174	39.3432	29.8269	21.505	15.0739	252	136	87.5	43	18.5	0.00295489	0.00175165	0.00235708	0.00247988	0.00161862	73.1977	42.2341	32.7418	24.5595
	45.5996	28.7888	23.8867	16.646	11.7543	246.5	131.5	81.5	44.5	21	0.00149984	0.00109673	0.00135943	0.00130056	0.0010546	55.4654	34.1419	26.4049	17.7427	13.2816	243	170.5	76.5	34.5	21.5	0.00188553	0.00146036	0.00196776	0.00137955	0.00142278	65.9766	39.3212	28.8694	22.0337	15.0747	241.5	100.5	81	43	24.5	0.00322021	0.00249424	0.00200032	0.00273304	0.00190398	73.6105	41.178	32.6547	24.1012
	45.6541	29.2805	22.5499	15.9455	12.6054	255.5	166.5	94.5	36	28.5	0.00175998	0.00105011	0.00128468	0.00116423	0.0012467	55.1252	33.9199	25.2652	19.3383	14.2122	249.5	163	76.5	51.5	23.5	0.00179481	0.00193688	0.0014821	0.00178907	0.0014685	65.8384	38.6685	27.8537	21.5904	16.1465	251	97.5	85	45.5	23.5	0.00323404	0.00194584	0.00200291	0.00202863	0.00199318	73.3574	43.3508	31.3555	23.9755
Signal energy characteristics of three kinds of piezoelectric patches
	0.50dBW noise								0.55dBW noise								0.60dBW noise								0.65dBW noise								0.70dBW noise								0.75dBW noise								0.80dBW noise
Normal	0.358164	0.353924	0.358585	0.340838	0.357443	0.348891	0.351379	0.358811	0.361115	0.35419	0.351548	0.3434	0.354562	0.356199	0.355094	0.352069	0.355244	0.359511	0.357794	0.345989	0.35499	0.346584	0.345468	0.362412	0.349448	0.357645	0.346391	0.357616	0.35774	0.341586	0.356885	0.360659	0.344939	0.3545	0.345591	0.348129	0.349313	0.365323	0.358147	0.361897	0.361357	0.36244	0.360176	0.350112	0.357957	0.332048	0.359139	0.344068	0.35407
	0.357598	0.353922	0.358248	0.340677	0.35668	0.349938	0.35214	0.35886	0.360734	0.354224	0.353336	0.343128	0.354292	0.356404	0.35419	0.351875	0.355322	0.359556	0.357501	0.346215	0.354887	0.346699	0.345476	0.362347	0.348747	0.356897	0.348118	0.358013	0.357371	0.340826	0.356982	0.361011	0.344712	0.354386	0.346642	0.347875	0.349398	0.364724	0.358113	0.362021	0.361821	0.362668	0.358818	0.350593	0.35816	0.332155	0.358859	0.344247	0.353843
	0.357981	0.353823	0.358907	0.340355	0.356845	0.34998	0.351782	0.35837	0.36106	0.354405	0.352656	0.343098	0.354699	0.355841	0.354661	0.351756	0.35533	0.359469	0.357825	0.345534	0.355049	0.346585	0.345554	0.362631	0.349115	0.357513	0.347256	0.357729	0.357647	0.341139	0.357019	0.36055	0.344913	0.354529	0.345764	0.347816	0.349463	0.365183	0.358043	0.362129	0.361438	0.362417	0.360529	0.350522	0.357797	0.331361	0.359242	0.343942	0.353966
	0.357859	0.353927	0.358048	0.341162	0.356768	0.350135	0.351371	0.358807	0.360686	0.354054	0.351468	0.343609	0.354428	0.356223	0.355567	0.352154	0.35515	0.35957	0.358413	0.346392	0.355005	0.346573	0.344925	0.361961	0.349442	0.357451	0.346447	0.357325	0.358073	0.341453	0.356579	0.36119	0.344723	0.35422	0.346798	0.348717	0.349095	0.364502	0.358423	0.361423	0.361806	0.362738	0.358991	0.350147	0.35809	0.33197	0.359099	0.344464	0.353969
	0.358122	0.353807	0.359111	0.340755	0.357351	0.348712	0.351462	0.358704	0.361037	0.354092	0.351802	0.343353	0.35448	0.35609	0.355319	0.352006	0.355159	0.359406	0.358248	0.345794	0.354954	0.34655	0.345532	0.362345	0.349439	0.357692	0.346579	0.357519	0.357661	0.341634	0.356946	0.360508	0.344884	0.354414	0.345831	0.348144	0.349236	0.365294	0.358251	0.361791	0.361212	0.362321	0.36069	0.350088	0.357815	0.331991	0.359267	0.343901	0.354033
	0.358053	0.353742	0.359392	0.340551	0.357097	0.348967	0.351614	0.358606	0.360995	0.354242	0.352159	0.343338	0.354464	0.355952	0.355151	0.35188	0.355168	0.359463	0.358204	0.345715	0.354911	0.346442	0.345646	0.362432	0.349295	0.357561	0.346894	0.357673	0.357667	0.341362	0.357024	0.360496	0.344887	0.354442	0.345796	0.348056	0.349318	0.365166	0.358275	0.361907	0.361194	0.362293	0.361004	0.350259	0.357709	0.331629	0.359347	0.343822	0.354026
	0.358157	0.353823	0.359177	0.340805	0.357229	0.348791	0.351405	0.35864	0.360934	0.354012	0.351705	0.343284	0.354341	0.356226	0.355559	0.352116	0.355109	0.359364	0.358542	0.345653	0.354898	0.346652	0.345552	0.362217	0.349463	0.357737	0.34648	0.357256	0.357793	0.341763	0.356932	0.360557	0.344882	0.354356	0.346111	0.348267	0.349167	0.365049	0.358374	0.361656	0.361183	0.362315	0.360647	0.350032	0.357807	0.332141	0.359319	0.343849	0.353984
	0.357572	0.354042	0.35763	0.341265	0.357074	0.349713	0.351842	0.358946	0.360635	0.353958	0.352597	0.343453	0.354479	0.35562	0.355247	0.352207	0.355229	0.359444	0.358458	0.346628	0.355025	0.34639	0.344978	0.361844	0.349254	0.357257	0.347581	0.357516	0.357388	0.34099	0.356829	0.361152	0.344481	0.354082	0.347603	0.348447	0.348911	0.364545	0.358324	0.361508	0.362148	0.362911	0.357801	0.350255	0.358391	0.331949	0.359047	0.344812	0.353824
	0.357621	0.354022	0.357528	0.341234	0.356962	0.350162	0.351689	0.358871	0.36069	0.354021	0.352249	0.343487	0.354594	0.35572	0.355289	0.352143	0.355255	0.359483	0.358385	0.346589	0.355088	0.346442	0.344847	0.361904	0.349324	0.357332	0.347241	0.357444	0.357605	0.341077	0.356723	0.361218	0.34454	0.354131	0.347387	0.348515	0.348972	0.364568	0.358293	0.361494	0.362147	0.362922	0.357943	0.350236	0.358354	0.331846	0.359068	0.344789	0.353863
	0.357791	0.354007	0.357819	0.341226	0.356872	0.350049	0.351511	0.358809	0.360692	0.354011	0.351822	0.343507	0.354485	0.355918	0.355547	0.352208	0.355191	0.359511	0.358539	0.346408	0.355037	0.34649	0.344906	0.361907	0.349425	0.357469	0.346782	0.357271	0.357858	0.341291	0.35668	0.361186	0.344641	0.354166	0.347184	0.348648	0.348996	0.364454	0.358414	0.361402	0.36197	0.362826	0.358489	0.350156	0.358215	0.331929	0.35911	0.344609	0.353905
	0.358167	0.353862	0.359058	0.340684	0.357212	0.348947	0.35145	0.358648	0.361013	0.354203	0.351741	0.343312	0.354468	0.356069	0.355325	0.352046	0.355217	0.359466	0.358247	0.34565	0.354976	0.346571	0.345519	0.362336	0.349445	0.35773	0.34652	0.357436	0.35778	0.341579	0.356922	0.360562	0.344924	0.354439	0.345845	0.348204	0.349266	0.365093	0.358283	0.3618	0.361255	0.362378	0.360618	0.350185	0.357807	0.331864	0.359306	0.343863	0.35405
	0.357795	0.353743	0.359127	0.340414	0.356645	0.349766	0.352027	0.358524	0.360943	0.354291	0.353192	0.343099	0.354454	0.356052	0.354461	0.351685	0.35525	0.359479	0.357804	0.345819	0.354882	0.346488	0.345702	0.362565	0.348881	0.35717	0.347826	0.357928	0.357484	0.340878	0.357107	0.360692	0.344837	0.354487	0.346107	0.347725	0.349467	0.364968	0.358117	0.362141	0.36146	0.362386	0.360402	0.35051	0.357796	0.331585	0.359186	0.343939	0.353905
	0.357638	0.353803	0.358784	0.340536	0.356504	0.350021	0.352184	0.358587	0.360839	0.354177	0.353541	0.342992	0.354326	0.356298	0.354276	0.351728	0.355255	0.359454	0.357727	0.345983	0.354837	0.346607	0.345656	0.362478	0.348724	0.356973	0.348192	0.357907	0.357399	0.340799	0.357098	0.360873	0.344759	0.354434	0.346542	0.347699	0.349442	0.364777	0.358113	0.362099	0.361642	0.362474	0.35966	0.350521	0.35794	0.331926	0.359048	0.344086	0.353809
	0.357835	0.353733	0.3592	0.340415	0.356718	0.349615	0.351982	0.358537	0.360965	0.354296	0.353054	0.343144	0.354462	0.356031	0.354533	0.351693	0.355248	0.35948	0.357834	0.345805	0.354882	0.346462	0.345715	0.362561	0.348941	0.357217	0.347698	0.357923	0.357507	0.340933	0.357097	0.360651	0.344854	0.354493	0.346001	0.347756	0.34946	0.365016	0.358136	0.362131	0.361406	0.362363	0.360555	0.350479	0.35777	0.331566	0.359212	0.343909	0.35393
	0.357838	0.353911	0.358524	0.340541	0.356747	0.349889	0.351938	0.358666	0.360987	0.354337	0.352866	0.343102	0.35449	0.35625	0.354328	0.351815	0.355365	0.359572	0.357464	0.345934	0.354954	0.346622	0.345535	0.362545	0.348943	0.3572	0.347592	0.35791	0.357541	0.340953	0.356984	0.360838	0.344871	0.354531	0.34603	0.347798	0.349508	0.364938	0.358042	0.362135	0.361627	0.36253	0.359684	0.350518	0.35797	0.331848	0.359041	0.344074	0.353941
	0.357544	0.354085	0.357553	0.341196	0.35703	0.349657	0.352018	0.358998	0.360691	0.353977	0.352983	0.343309	0.354401	0.355883	0.354794	0.352154	0.355289	0.359472	0.358029	0.346661	0.354972	0.34648	0.345121	0.361979	0.349061	0.357081	0.347938	0.357715	0.357248	0.340864	0.356898	0.361162	0.34453	0.354173	0.347467	0.3482	0.349042	0.364575	0.358208	0.361698	0.362166	0.362884	0.357634	0.350327	0.358432	0.332189	0.358919	0.344779	0.353805
	0.357622	0.354	0.357996	0.340848	0.35693	0.349647	0.352104	0.358918	0.360865	0.354151	0.353193	0.343172	0.354408	0.356183	0.354261	0.35195	0.355355	0.359532	0.357475	0.34641	0.354934	0.346577	0.345409	0.362312	0.348879	0.356988	0.348038	0.358005	0.357237	0.340822	0.356992	0.361005	0.34469	0.354383	0.346679	0.34783	0.349336	0.364851	0.35804	0.362057	0.361907	0.362693	0.358525	0.350456	0.35824	0.332157	0.358899	0.344449	0.353861
	0.358106	0.353825	0.359059	0.340546	0.356879	0.349485	0.351611	0.358525	0.361067	0.354294	0.352157	0.343212	0.354515	0.356125	0.354932	0.351871	0.355249	0.359512	0.357955	0.345664	0.354954	0.34654	0.345576	0.362531	0.349239	0.357559	0.346856	0.357615	0.357794	0.341299	0.356966	0.360638	0.344975	0.354535	0.345737	0.347994	0.349425	0.36502	0.358189	0.361976	0.361331	0.362367	0.36071	0.350315	0.35775	0.331682	0.359254	0.343856	0.354021
	0.357911	0.353783	0.359113	0.340464	0.356748	0.349578	0.351884	0.358556	0.361007	0.354286	0.352813	0.343129	0.35445	0.356161	0.35459	0.351739	0.355274	0.359497	0.357797	0.345765	0.354895	0.34651	0.345683	0.362565	0.349008	0.357299	0.347467	0.357836	0.357588	0.341036	0.357059	0.360672	0.344903	0.354525	0.345916	0.347809	0.349476	0.364998	0.358137	0.362086	0.361388	0.362368	0.360532	0.35043	0.35778	0.331707	0.359193	0.343873	0.353957
	0.357678	0.354138	0.357348	0.341253	0.357064	0.349804	0.351768	0.359031	0.36074	0.354044	0.352324	0.34342	0.354464	0.355996	0.354973	0.352232	0.355311	0.35956	0.357967	0.346651	0.355051	0.346543	0.344959	0.361959	0.349236	0.357239	0.347338	0.357603	0.3575	0.341067	0.356744	0.361235	0.344605	0.35421	0.347198	0.348394	0.349067	0.364572	0.358224	0.361626	0.362167	0.362932	0.357635	0.350277	0.358431	0.3322	0.35891	0.344779	0.353887
Broken	0.357946	0.354097	0.357287	0.341129	0.356925	0.350702	0.351211	0.358791	0.361027	0.354299	0.351032	0.343532	0.354757	0.356365	0.354941	0.352226	0.355393	0.359666	0.357668	0.346345	0.355181	0.346741	0.344856	0.362142	0.349453	0.357563	0.34619	0.357415	0.358069	0.3415	0.356455	0.361306	0.344881	0.354424	0.346373	0.3485	0.349369	0.364723	0.357909	0.361709	0.36207	0.362908	0.358244	0.35024	0.35822	0.332029	0.35898	0.344624	0.354077
	0.357863	0.353929	0.358006	0.340615	0.356599	0.350693	0.351735	0.358629	0.361053	0.354366	0.352369	0.343152	0.354687	0.356427	0.354315	0.351804	0.355378	0.359623	0.357217	0.346114	0.355047	0.346755	0.345218	0.362637	0.349014	0.357236	0.347159	0.357863	0.357803	0.341047	0.356781	0.361051	0.344912	0.354565	0.345855	0.347873	0.349573	0.365	0.357991	0.362084	0.361776	0.362626	0.359367	0.350447	0.358023	0.331831	0.358954	0.344269	0.353959
	0.358159	0.35409	0.357897	0.340939	0.356936	0.350041	0.35119	0.358813	0.360888	0.354244	0.351022	0.343352	0.354422	0.356742	0.355258	0.352245	0.355286	0.359675	0.357848	0.345904	0.355092	0.347	0.345006	0.362177	0.349473	0.35767	0.34596	0.357247	0.358192	0.341802	0.356565	0.361052	0.344932	0.354434	0.346009	0.348542	0.349327	0.364726	0.358309	0.361601	0.361634	0.362684	0.359206	0.350209	0.358076	0.33239	0.358986	0.344141	0.354049
	0.357897	0.354093	0.357256	0.341154	0.356832	0.350734	0.351341	0.358784	0.360879	0.354177	0.351384	0.343469	0.354749	0.356169	0.355191	0.352164	0.355329	0.359621	0.357908	0.346425	0.355192	0.346697	0.344681	0.362134	0.349445	0.357509	0.346396	0.357359	0.358037	0.341377	0.356535	0.361294	0.344776	0.354326	0.346608	0.348544	0.349194	0.364663	0.358198	0.361581	0.362073	0.362896	0.358252	0.350204	0.358268	0.331932	0.358988	0.344695	0.353981
	0.357783	0.354156	0.357151	0.34114	0.35721	0.350132	0.351574	0.358937	0.360859	0.354203	0.351881	0.34345	0.354783	0.355741	0.355055	0.352217	0.355384	0.359584	0.357869	0.346481	0.355221	0.346573	0.34479	0.362088	0.349411	0.357487	0.346899	0.357545	0.357609	0.341184	0.356662	0.361164	0.344645	0.354271	0.346804	0.34842	0.349111	0.364864	0.358128	0.361639	0.362163	0.362973	0.357818	0.350306	0.358418	0.331874	0.358962	0.344795	0.353953
	0.357833	0.354128	0.357165	0.341161	0.357025	0.350459	0.351465	0.358853	0.360877	0.354209	0.351647	0.343464	0.354773	0.355923	0.355105	0.352187	0.355381	0.359608	0.35788	0.346454	0.35521	0.346607	0.344749	0.362098	0.349442	0.357506	0.346647	0.357442	0.357816	0.341257	0.356605	0.361241	0.344714	0.3543	0.346708	0.348475	0.349159	0.364752	0.358143	0.361635	0.362141	0.362956	0.357983	0.350265	0.358358	0.331869	0.358982	0.344752	0.35397
	0.357861	0.354113	0.357226	0.341144	0.356899	0.350636	0.35139	0.358822	0.360869	0.354202	0.351483	0.343473	0.354746	0.35607	0.355165	0.352176	0.355358	0.359628	0.357889	0.346429	0.355195	0.346667	0.344702	0.362118	0.349449	0.357511	0.346485	0.357389	0.357965	0.341328	0.356551	0.361276	0.344743	0.354318	0.346635	0.348532	0.349193	0.364689	0.358181	0.361599	0.362102	0.362931	0.35815	0.350243	0.358306	0.331898	0.358972	0.344705	0.35398
	0.358179	0.354065	0.358042	0.340948	0.357039	0.349754	0.351209	0.358823	0.360942	0.354195	0.351065	0.343339	0.354423	0.356678	0.355261	0.352269	0.355274	0.359623	0.357884	0.345895	0.355054	0.346921	0.345131	0.362208	0.349493	0.357689	0.346001	0.357252	0.35812	0.341801	0.356619	0.360988	0.344951	0.354436	0.345969	0.348478	0.349315	0.364811	0.358279	0.361634	0.36157	0.362619	0.359396	0.350151	0.358058	0.3324	0.359016	0.344117	0.354053
	0.358208	0.354071	0.358099	0.340928	0.357158	0.34952	0.351231	0.35884	0.360989	0.354219	0.351098	0.343353	0.354447	0.356592	0.355222	0.352252	0.355303	0.359622	0.357828	0.345885	0.355064	0.346866	0.345178	0.362242	0.349508	0.357719	0.346025	0.357311	0.358031	0.341784	0.356674	0.360912	0.344966	0.354467	0.345847	0.348411	0.349322	0.364914	0.358242	0.3617	0.361527	0.362593	0.35951	0.350151	0.358043	0.33236	0.359052	0.344085	0.354078
	0.357895	0.354128	0.357238	0.341143	0.356921	0.350526	0.351379	0.358857	0.360861	0.354231	0.35143	0.343478	0.354705	0.356119	0.355154	0.352206	0.355375	0.359658	0.357842	0.346411	0.355181	0.346668	0.344746	0.362106	0.349461	0.357519	0.346429	0.357404	0.357975	0.34134	0.356548	0.361277	0.344769	0.354332	0.346573	0.348551	0.349208	0.364658	0.358193	0.361607	0.362078	0.362931	0.358174	0.350257	0.358301	0.331943	0.358957	0.344668	0.353997
	0.357892	0.354132	0.357259	0.341137	0.356939	0.350466	0.35139	0.35887	0.360864	0.354233	0.351444	0.343492	0.35469	0.356103	0.355156	0.352202	0.355366	0.359661	0.357858	0.346408	0.355186	0.346663	0.344749	0.362096	0.349457	0.357515	0.346457	0.357419	0.357959	0.341336	0.356545	0.361267	0.344761	0.354326	0.346589	0.348559	0.349189	0.364662	0.358206	0.361599	0.362077	0.362932	0.358164	0.350269	0.358306	0.331941	0.358953	0.344667	0.354003
	0.35784	0.354191	0.357083	0.341185	0.357167	0.350072	0.351535	0.359008	0.360896	0.354222	0.351727	0.343482	0.354712	0.355958	0.354952	0.352238	0.355442	0.359655	0.357659	0.346563	0.355193	0.346585	0.344786	0.362108	0.349419	0.357439	0.346771	0.357603	0.357685	0.341186	0.356619	0.361234	0.344725	0.354335	0.346633	0.348418	0.349179	0.364783	0.358114	0.361695	0.362156	0.362979	0.357784	0.350293	0.358422	0.332008	0.358906	0.344769	0.353997
	0.358008	0.353927	0.358439	0.34055	0.356911	0.349914	0.351667	0.358634	0.361126	0.354422	0.352213	0.343229	0.354685	0.356115	0.354539	0.351846	0.355387	0.359616	0.357444	0.345882	0.35507	0.346591	0.3454	0.362595	0.349174	0.35744	0.346977	0.357827	0.357713	0.341141	0.356897	0.360792	0.344953	0.354582	0.345624	0.347895	0.34952	0.365123	0.358008	0.362136	0.361573	0.362527	0.359993	0.35044	0.357923	0.331637	0.35911	0.344069	0.354045
	0.357799	0.354091	0.357705	0.34084	0.356937	0.349886	0.351878	0.358932	0.360962	0.354256	0.35261	0.343164	0.354479	0.356453	0.354244	0.35201	0.355429	0.359631	0.357184	0.346299	0.35502	0.346752	0.345286	0.362399	0.349005	0.357145	0.347482	0.357909	0.357485	0.341029	0.356847	0.361061	0.344819	0.354487	0.346269	0.347913	0.349448	0.364885	0.357991	0.362051	0.361906	0.362736	0.358485	0.350449	0.358253	0.332292	0.358817	0.344394	0.353939
	0.357878	0.354037	0.357966	0.340668	0.356818	0.350103	0.351815	0.358777	0.361033	0.354366	0.352502	0.343141	0.354556	0.356395	0.354257	0.351926	0.355431	0.359656	0.357192	0.34607	0.355044	0.346728	0.345351	0.362522	0.349012	0.357241	0.347309	0.357881	0.357627	0.341041	0.356854	0.360993	0.344901	0.354565	0.34595	0.347876	0.349536	0.364931	0.357975	0.362122	0.36179	0.36266	0.359086	0.350498	0.358106	0.332022	0.35892	0.344226	0.353977
	0.358119	0.35416	0.357535	0.341091	0.357065	0.349978	0.351252	0.358872	0.360963	0.354249	0.351095	0.343438	0.354589	0.356333	0.355224	0.352286	0.355375	0.359673	0.357794	0.346168	0.355147	0.346739	0.344917	0.362174	0.349548	0.357683	0.346078	0.357329	0.358058	0.341558	0.356569	0.361132	0.344905	0.354425	0.346183	0.348538	0.349261	0.364723	0.358217	0.36163	0.361843	0.362813	0.358717	0.350198	0.358202	0.332148	0.358983	0.344412	0.354065
	0.357803	0.354204	0.357244	0.34098	0.357181	0.349691	0.351864	0.359103	0.360935	0.35426	0.352366	0.343278	0.354569	0.356277	0.354345	0.352152	0.355444	0.359644	0.357282	0.346485	0.355065	0.346646	0.345153	0.362282	0.349131	0.357224	0.347385	0.357841	0.35741	0.341035	0.356828	0.361109	0.344787	0.354442	0.346371	0.34811	0.349348	0.364894	0.357926	0.361989	0.362081	0.362903	0.357767	0.350466	0.35843	0.332302	0.358762	0.344627	0.353982
	0.358174	0.354176	0.357553	0.341046	0.357159	0.349843	0.35123	0.358885	0.361037	0.354302	0.351022	0.343447	0.354642	0.356292	0.35516	0.352272	0.355389	0.359703	0.357675	0.346138	0.355177	0.346726	0.344936	0.362241	0.349568	0.357727	0.346012	0.357397	0.358037	0.341564	0.356577	0.361073	0.344942	0.354472	0.345967	0.34849	0.349301	0.364833	0.358171	0.361698	0.361819	0.362789	0.358839	0.350211	0.358191	0.332103	0.358986	0.344374	0.354103
	0.358034	0.354229	0.357193	0.341156	0.357181	0.349952	0.351342	0.35899	0.360971	0.354272	0.351237	0.343479	0.354657	0.356191	0.355062	0.352311	0.355421	0.359714	0.35762	0.346366	0.355197	0.346694	0.344828	0.362149	0.349518	0.357606	0.346289	0.357474	0.3579	0.341416	0.356558	0.361193	0.344843	0.354409	0.346296	0.348506	0.349241	0.364763	0.358148	0.361674	0.36202	0.362918	0.358159	0.35025	0.358339	0.332136	0.358913	0.344585	0.354063
	0.358216	0.354073	0.358068	0.340731	0.357114	0.349733	0.351359	0.358757	0.361169	0.354433	0.351378	0.343323	0.354679	0.356273	0.354827	0.352089	0.355423	0.359695	0.357422	0.345869	0.355143	0.346702	0.345231	0.362499	0.34943	0.35769	0.346247	0.357611	0.35794	0.341449	0.356723	0.360866	0.345035	0.354605	0.345456	0.34817	0.349482	0.365066	0.35806	0.361975	0.361597	0.362615	0.35969	0.350331	0.358006	0.331886	0.359061	0.344105	0.354126
Degumed	0.358269	0.354294	0.357004	0.340941	0.357275	0.34996	0.351321	0.359001	0.361196	0.354489	0.351157	0.343374	0.354789	0.356384	0.354536	0.352247	0.355437	0.359849	0.356906	0.346256	0.355298	0.346845	0.344935	0.362464	0.349403	0.357635	0.34619	0.357728	0.357885	0.341411	0.356568	0.361129	0.345047	0.354616	0.345532	0.348224	0.34949	0.365048	0.357911	0.361986	0.362061	0.36288	0.358291	0.350362	0.358322	0.332156	0.358792	0.344455	0.354151
	0.358269	0.354293	0.357005	0.340938	0.357274	0.349961	0.351323	0.359002	0.3612	0.354489	0.351159	0.343374	0.354789	0.356384	0.354531	0.352246	0.355432	0.359849	0.356906	0.346256	0.355298	0.346844	0.344938	0.362466	0.349403	0.357633	0.346193	0.357728	0.357885	0.341408	0.35657	0.361129	0.345048	0.354616	0.34553	0.348224	0.349492	0.365048	0.357908	0.361988	0.362064	0.36288	0.358289	0.350364	0.358321	0.332154	0.358793	0.344455	0.354153
	0.358256	0.354297	0.356985	0.340946	0.357277	0.349963	0.351334	0.359009	0.36119	0.354485	0.351182	0.343373	0.354788	0.356383	0.354523	0.352249	0.355446	0.359846	0.3569	0.346268	0.355296	0.346842	0.344933	0.362459	0.3494	0.357623	0.346217	0.357732	0.357873	0.341399	0.35657	0.361136	0.345041	0.354613	0.345554	0.348221	0.349488	0.365044	0.357906	0.361987	0.362069	0.362888	0.358246	0.350366	0.358332	0.332165	0.358787	0.344468	0.354148
	0.35825	0.354298	0.357006	0.340944	0.35728	0.349962	0.351323	0.359004	0.361201	0.354487	0.351154	0.343374	0.354788	0.356384	0.354536	0.352247	0.355455	0.359846	0.356905	0.346253	0.355296	0.346842	0.344933	0.362461	0.349415	0.357635	0.346186	0.357724	0.357884	0.34141	0.356566	0.361128	0.345038	0.354617	0.345535	0.348226	0.349491	0.365049	0.357912	0.361987	0.362046	0.362882	0.358291	0.350364	0.358324	0.33216	0.358796	0.344458	0.354151
	0.35824	0.3543	0.356987	0.34095	0.357277	0.349972	0.351333	0.359009	0.36119	0.354486	0.351166	0.343375	0.354788	0.356385	0.35453	0.352252	0.355465	0.359844	0.356906	0.346262	0.355293	0.34684	0.344928	0.362453	0.349415	0.357626	0.346205	0.357723	0.357878	0.341402	0.356566	0.361136	0.345034	0.354613	0.345561	0.34823	0.349488	0.365041	0.357904	0.361984	0.362056	0.362892	0.358243	0.350368	0.358334	0.332166	0.358791	0.344472	0.354149
	0.358244	0.354299	0.357007	0.340942	0.357281	0.349965	0.351322	0.359006	0.361194	0.354489	0.351156	0.343374	0.354789	0.356384	0.354535	0.352249	0.355466	0.359844	0.356903	0.346251	0.355294	0.346841	0.344933	0.362459	0.349414	0.357635	0.346186	0.357726	0.357884	0.341409	0.356565	0.36113	0.345036	0.354617	0.345532	0.348227	0.349492	0.36505	0.357913	0.361988	0.362039	0.362884	0.358296	0.350365	0.358324	0.332158	0.358796	0.344459	0.35415
	0.358245	0.354299	0.357005	0.340945	0.357281	0.349962	0.351325	0.359006	0.361197	0.354488	0.351154	0.343374	0.354789	0.356384	0.354537	0.352248	0.355463	0.359844	0.356906	0.346252	0.355294	0.34684	0.344932	0.362459	0.349417	0.357635	0.346187	0.357723	0.357883	0.34141	0.356567	0.361128	0.345037	0.354617	0.345535	0.348228	0.349491	0.365049	0.35791	0.361987	0.362043	0.362885	0.358288	0.350366	0.358325	0.33216	0.358796	0.344459	0.354151
	0.358248	0.3543	0.357001	0.340946	0.357281	0.349961	0.351323	0.359006	0.361194	0.354488	0.351151	0.343375	0.354789	0.356385	0.354539	0.352251	0.355461	0.359844	0.356907	0.346253	0.355294	0.346841	0.344931	0.362457	0.349415	0.357635	0.346186	0.357721	0.357884	0.341411	0.356566	0.36113	0.345038	0.354616	0.345537	0.34823	0.34949	0.365047	0.357911	0.361985	0.362046	0.362885	0.358281	0.350365	0.358326	0.332162	0.358795	0.34446	0.35415
	0.358231	0.3543	0.357001	0.340943	0.357278	0.349965	0.351339	0.35901	0.361192	0.354488	0.351186	0.34337	0.354785	0.356388	0.354517	0.352246	0.355471	0.359843	0.356893	0.346258	0.355291	0.34684	0.344935	0.362459	0.349404	0.357621	0.346218	0.357734	0.357872	0.341398	0.356571	0.361131	0.345031	0.354617	0.345545	0.348218	0.349494	0.365048	0.357907	0.361994	0.362043	0.362887	0.358267	0.350372	0.35833	0.332167	0.358791	0.344463	0.354146
	0.35823	0.354303	0.356988	0.340954	0.35728	0.349972	0.351328	0.359012	0.361193	0.354485	0.351157	0.343376	0.354786	0.356386	0.354537	0.352252	0.355474	0.359843	0.356905	0.346261	0.355293	0.34684	0.344923	0.362451	0.349418	0.357629	0.346193	0.357721	0.357881	0.341406	0.356563	0.361136	0.345029	0.354614	0.345554	0.348233	0.349488	0.365041	0.357912	0.361983	0.362047	0.362892	0.358254	0.350366	0.358333	0.332168	0.358792	0.344469	0.354149
	0.358226	0.354302	0.357008	0.340947	0.357283	0.349965	0.351327	0.359009	0.361192	0.354489	0.351154	0.343375	0.35479	0.356385	0.354537	0.352249	0.35549	0.35984	0.356902	0.346247	0.35529	0.346837	0.344928	0.362455	0.349423	0.357633	0.346186	0.357722	0.357883	0.341409	0.356566	0.361127	0.345024	0.354619	0.345536	0.348229	0.349493	0.36505	0.357912	0.361989	0.36202	0.362888	0.358292	0.35037	0.358328	0.332163	0.358799	0.344462	0.354147
	0.358207	0.354303	0.357002	0.340947	0.357281	0.34997	0.351343	0.359014	0.361186	0.354488	0.351187	0.34337	0.354787	0.356387	0.354518	0.352247	0.355512	0.359837	0.356887	0.346253	0.355284	0.346834	0.344929	0.362453	0.349423	0.357618	0.346216	0.357731	0.357869	0.341395	0.356568	0.361129	0.345019	0.354618	0.345549	0.34822	0.349495	0.36505	0.357909	0.361995	0.362018	0.362891	0.358268	0.350375	0.358335	0.33217	0.358795	0.344469	0.354146
	0.35819	0.354309	0.356989	0.340959	0.357285	0.349978	0.351338	0.359019	0.361194	0.354484	0.351168	0.343375	0.354787	0.356383	0.35453	0.352251	0.35552	0.359836	0.356895	0.346259	0.355286	0.346832	0.344918	0.362444	0.34943	0.357622	0.346203	0.357723	0.357874	0.341399	0.356563	0.361135	0.345011	0.354615	0.345561	0.348232	0.34949	0.365045	0.357913	0.361987	0.36202	0.362898	0.358248	0.350372	0.35834	0.332172	0.358795	0.344478	0.354147
	0.358203	0.354303	0.357005	0.340947	0.357281	0.349972	0.351342	0.359014	0.361187	0.354489	0.351185	0.34337	0.354787	0.356388	0.354519	0.352246	0.35552	0.359835	0.356887	0.346249	0.355284	0.346833	0.344929	0.362453	0.349425	0.35762	0.346213	0.35773	0.35787	0.341396	0.356568	0.361128	0.345018	0.354619	0.345546	0.34822	0.349496	0.36505	0.357909	0.361996	0.362012	0.362892	0.358275	0.350376	0.358334	0.33217	0.358796	0.344468	0.354146
	0.358191	0.354308	0.357005	0.340956	0.357288	0.349972	0.351331	0.359016	0.361202	0.354485	0.351149	0.343375	0.354787	0.356385	0.354539	0.35225	0.355524	0.359836	0.356899	0.346247	0.355285	0.346832	0.34492	0.362446	0.34944	0.357631	0.346181	0.357718	0.357882	0.341408	0.356562	0.361128	0.345013	0.354618	0.345545	0.348235	0.349492	0.365049	0.357915	0.361987	0.362007	0.362893	0.358281	0.35037	0.358334	0.332169	0.3588	0.344469	0.354151
	0.358165	0.354311	0.356999	0.340962	0.357289	0.34998	0.351341	0.359021	0.36119	0.354486	0.35116	0.343377	0.354788	0.356385	0.354532	0.352253	0.355578	0.359827	0.356891	0.346247	0.355277	0.346823	0.344912	0.362434	0.349458	0.357621	0.346195	0.357716	0.357873	0.341399	0.356559	0.36113	0.345001	0.354617	0.345564	0.348236	0.349492	0.365046	0.357909	0.361988	0.361987	0.362902	0.358254	0.350377	0.358344	0.332176	0.358802	0.344481	0.35415
	0.358178	0.354306	0.357021	0.340948	0.357285	0.349975	0.351339	0.359014	0.361197	0.35449	0.351167	0.343371	0.354788	0.356387	0.354527	0.352244	0.35556	0.35983	0.356885	0.346235	0.355279	0.346826	0.344923	0.362449	0.349446	0.357625	0.346193	0.357723	0.357876	0.3414	0.356565	0.361122	0.34501	0.354623	0.345534	0.348225	0.349499	0.365054	0.357912	0.361996	0.361984	0.362891	0.358304	0.350377	0.358332	0.332167	0.358804	0.344464	0.35415
	0.358179	0.354309	0.356996	0.340956	0.357287	0.349976	0.351346	0.35902	0.361191	0.354486	0.351184	0.343372	0.354786	0.356385	0.354521	0.352248	0.355545	0.359832	0.356885	0.346254	0.355281	0.346829	0.34492	0.362444	0.349436	0.357617	0.346214	0.357728	0.357867	0.341392	0.356565	0.361131	0.345008	0.354617	0.345559	0.348226	0.349493	0.365048	0.357911	0.361993	0.362006	0.362898	0.358254	0.350377	0.358341	0.332174	0.358796	0.344476	0.354147
	0.358188	0.354307	0.357015	0.340951	0.357287	0.349973	0.351332	0.359014	0.361196	0.354489	0.351153	0.343374	0.354789	0.356386	0.354536	0.352248	0.355545	0.359833	0.356893	0.346238	0.355282	0.34683	0.344921	0.362447	0.349446	0.35763	0.346181	0.357717	0.357881	0.341406	0.356562	0.361125	0.345012	0.354621	0.345537	0.348232	0.349496	0.365052	0.357915	0.361991	0.36199	0.362892	0.358298	0.350374	0.358332	0.332167	0.358804	0.344465	0.35415
	0.358185	0.354306	0.35702	0.340948	0.357286	0.349972	0.351337	0.359014	0.361197	0.354489	0.351163	0.343372	0.354788	0.356387	0.35453	0.352245	0.355549	0.359832	0.356889	0.346236	0.35528	0.346829	0.344924	0.36245	0.349441	0.357627	0.34619	0.357722	0.357878	0.341402	0.356565	0.361123	0.345012	0.354622	0.345533	0.348226	0.349498	0.365054	0.357913	0.361995	0.361988	0.362891	0.358304	0.350375	0.358331	0.332167	0.358804	0.344463	0.35415
[truncated: 41 more columns]
